# Supplementary material for: RecQ helicases in the malaria parasite Plasmodium falciparum affect genome stability, gene expression patterns and DNA replication dynamics
Source: PLoS Genet. 2018 Jul 2;14(7):e1007490. doi: 10.1371/journal.pgen.1007490 (PMC6044543; doi:10.1371/journal.pgen.1007490)
Supplement: S1 Spreadsheet — Sheet 1: Indicates, for each sample, the percentage of the 3D7 reference genome that is covered by at least 5 or 10 reads. European Nucleotide Archive accession numbers are given for 85 3D7-derived genomes. Sheet 2: All Base Pair Subsitutions (BPS) identified, with a summary table of the type of substitutions. Sheet 3: All micro-indels identified, with summary tables per clone and per generation. Sheet 4: All Structural Variants identified, with summary tables per clone and per generation. Sheet 5: All Structural Variants within var genes, including the domain names where the recombination occurred, and the precise coordinates of the ‘Identity Block’ (sequence 100% identical between the two recombining var genes in which the cross-over must have occurred). Sheet 6: Mutation rate calculations. (XLSX) [file pgen.1007490.s023.xlsx]

## Sheet: GenomicDataAccession
		Percentage of the 3D7 reference genome covered:
CloneID	Accession ID	≥ 5 reads	≥ 10 reads
3D7-P	ERS626228	0.91	0.83
3D7-1a	ERS626229	0.96	0.92
3D7-1b	ERS626230	0.94	0.9
3D7-1c	ERS626231	0.93	0.89
3D7-1d	ERS626232	0.88	0.81
3D7-1e	ERS626233	0.93	0.89
3D7-1f	ERS626234	0.93	0.89
3D7-2a	ERS760622	0.97	0.95
3D7-2b	ERS760623	0.97	0.94
3D7-2c	ERS760624	0.97	0.93
3D7-2d	ERS760625	0.98	0.96
3D7-2e	ERS760626	0.98	0.95
3D7-3a	ERS807012	0.98	0.96
3D7-3b	ERS807013	0.98	0.97
3D7-3c	ERS807014	0.98	0.97
3D7-3d	ERS807015	0.96	0.94
3D7-3e	ERS807016	0.97	0.95
3D7-3f	ERS807017	0.97	0.95
3D7-3g	ERS807018	0.98	0.97
3D7-3h	ERS807019	0.97	0.95
3D7-3i	ERS807020	0.98	0.97
3D7-4a	ERS1190185	0.94	0.91
3D7-4b	ERS1190186	0.96	0.93
3D7-4c	ERS1190187	0.97	0.94
3D7-4d	ERS1190188	0.95	0.92
3D7-4e	ERS1190189	0.95	0.92
3D7-4f	ERS1190190	0.94	0.9
3D7-4g	ERS1190191	0.97	0.94
BLM-P	ERS626235	0.9	0.83
BLM-1a	ERS626236	0.94	0.9
BLM-1b	ERS626237	0.82	0.71
BLM-1c	ERS626238	0.84	0.75
BLM-1d	ERS626239	0.89	0.83
BLM-1e	ERS626240	0.68	0.5
BLM-1f	ERS626241	0.83	0.73
BLM-2a	ERS760627	0.98	0.95
BLM-2b	ERS760628	0.98	0.94
BLM-2c	ERS760629	0.97	0.95
BLM-2d	ERS760630	0.98	0.95
BLM-2e	ERS760631	0.98	0.96
BLM-2f	ERS760632	0.98	0.96
BLM-3a	ERS806989	0.98	0.96
BLM-3b	ERS806990	0.97	0.95
BLM-3c	ERS806991	0.97	0.95
BLM-3d	ERS806992	0.98	0.96
BLM-3e	ERS806993	0.97	0.95
BLM-3f	ERS806994	0.98	0.96
BLM-3g	ERS806995	0.98	0.96
BLM-3h	ERS806996	0.98	0.96
BLM-3i	ERS806997	0.98	0.96
BLM-3j	ERS806998	0.97	0.95
BLM-3k	ERS806999	0.97	0.95
BLM-3l	ERS807000	0.98	0.96
BLM-4a	ERS1190192	0.97	0.95
BLM-4b	ERS1190193	0.94	0.9
BLM-4c	ERS1190194	0.94	0.91
BLM-4d	ERS1190195	0.92	0.87
BLM-4e	ERS1190196	0.96	0.93
BLM-4f	ERS1190197	0.97	0.95
BLM-4g	ERS1190198	0.97	0.95
BLM-4h	ERS1190199	0.92	0.88
BLM-4i	ERS1190200	0.97	0.94
BLM-4j	ERS1190201	0.95	0.92
BLM-4k	ERS1190202	0.95	0.91
BLM-4l	ERS1190203	0.95	0.92
WRN-P	ERS807021	0.98	0.95
WRN-1a	ERS807001	0.98	0.96
WRN-1b	ERS807002	0.97	0.94
WRN-1c	ERS807003	0.97	0.95
WRN-1d	ERS807004	0.95	0.92
WRN-1e	ERS807005	0.97	0.95
WRN-1f	ERS807006	0.98	0.96
WRN-1g	ERS807007	0.98	0.96
WRN-1h	ERS807008	0.97	0.95
WRN-1i	ERS807009	0.98	0.96
WRN-1j	ERS807010	0.98	0.95
WRN-1k	ERS807011	0.97	0.94
WRN-2a	ERS1029699	0.98	0.96
WRN-2b	ERS1029700	0.98	0.96
WRN-2c	ERS1029701	0.98	0.96
WRN-2d	ERS1029702	0.97	0.95
WRN-2e	ERS1029703	0.98	0.96
WRN-2f	ERS1029704	0.99	0.97
WRN-2g	ERS1029705	0.99	0.97
WRN-2h	ERS1029706	0.99	0.97
	MEDIAN =	0.97	0.95

## Sheet: BPS
PARENT	PROGENY	CHROM	POS	REF	ALT	Transition/Transversion	Ref_reads	ALT_reads	Type	Gene ID	Annotation	snptype	Ref codon	Alt codon	Ref amino acid	Mutant amino acid
3D7-P	3D7-1a	Pf3D7_01	618038	T	C	Ts	0	112	intergenic	NA	NA	NonCoding	NA	NA	NA	NA			Summary of Base Pair Substitution per clone tree
3D7-P	3D7-1b	Pf3D7_02	626905	G	T	Tv	0	60	intergenic	NA	NA	NonCoding	NA	NA	NA	NA				A:T→G:C	G:C→A:T	A:T→C:G	A:T→T:A	G:C→T:A	G:C→C:G	Ts	Tv	Total	Ts:Tv
3D7-P	3D7-1d	Pf3D7_03	7005	A	T	Tv	2	87	intergenic	NA	NA	NonCoding	NA	NA	NA	NA			3D7	3	1	0	2	2	3	4	7	11	0.571429
3D7-P	3D7-1f	Pf3D7_14	2775567	T	C	Ts	0	141	Exon	PF3D7_1467900	rab GTPase activator, putative	synonymous	TGT	TGC	C	C			ΔPfBLM	3	2	1	0	1	3	4	6	10	0.666667
3D7-P	3D7-1a,3D7-1e,3D7-1f	Pf3D7_14	2540369	A	T	Tv	0	110	Exon	PF3D7_1462400	conserved Plasmodium protein, unknown function	nonsense	TAT	TAA	Y	*			PfWRN-k/d	3	2	1	5	1	1	5	8	13	0.625
3D7-1d	3D7-3d	Pf3D7_12	653106	G	T	Tv	0	16	intergenic	NA	NA	NonCoding	NA	NA	NA	NA			Total	9	5	2	7	4	7	13	21	34	0.621032
3D7-3g	3D7-4c, 3D7-4e, 3D7-4f	Pf3D7_12	1473642	G	C	Tv	3	484	Exon	PF3D7_1235300	CCR4-NOT transcription complex subunit 4, putative	nonsynonymous	CGT	CCT	R	P
3D7-3g	3D7-4a	Pf3D7_13	2873909	C	T	Ts	0	11	intergenic	NA	NA	NonCoding	NA	NA	NA	NA
3D7-3g	3D7-4f	Pf3D7_13	1381934	A	G	Ts	1	60	intergenic	NA	NA	NonCoding	NA	NA	NA	NA
3D7-3g	3D7-4b	Pf3D7_02	945819	G	C	Tv	3	487	intergenic	NA	NA	NonCoding	NA	NA	NA	NA
BLM-P	BLM_1c	Pf3D7_07	296032	G	T	Tv	0	69	Exon	PF3D7_0706000	conserved Plasmodium protein, unknown function	nonsynonymous	AGG	ATG	R	M
BLM-P	BLM_1e	Pf3D7_07	567568	C	A	Tv	2	43	Exon	PF3D7_0712600	erythrocyte membrane protein 1, PfEMP1 VAR	nonsense	GAA	TAA	E	*
BLM-1f	BLM-2e	Pf3D7_11	1229873	G	C	Tv	0	214	Exon	PF3D7_1131800	oxysterol-binding protein-related protein 2	nonsense	TCA	TGA	S	*
BLM-1f	BLM-3c	Pf3D7_03	113255	T	C	Ts	0	168	intergenic	NA	NA	NonCoding	NA	NA	NA	NA
BLM-1f	BLM-3f	Pf3D7_06	1387102	G	C	Tv	0	322	intergenic	NA	NA	NonCoding	NA	NA	NA	NA
BLM-1f	BLM-3g	Pf3D7_13	2238348	T	C	Ts	0	29	intergenic	NA	NA	NonCoding	NA	NA	NA	NA
BLM-3g	BLM-4b	Pf3D7_08	37631	G	C	Tv	2	452	Exon	PF3D7_0800200	erythrocyte membrane protein 1, PfEMP1 VAR	nonsynonymous	ACC	AGC	T	S
BLM-3g	BLM-4c	Pf3D7_04	1121076	A	C	Tv	6	357	Exon	PF3D7_0424700	serine threonine protein kinase, FIKK family FIKK4.2	nonsynonymous	AAT	CAT	N	H
BLM-3g	BLM-4f	Pf3D7_08	1464844	G	A	Ts	3	305	intergenic	NA	NA	NonCoding	NA	NA	NA	NA
BLM-3g	BLM-4j	Pf3D7_09	16389	C	T	Ts	21	412	intergenic	NA	NA	NonCoding	NA	NA	NA	NA
WRN-P	WRN-1c	Pf3D7_12	1665245	A	G	Ts	6	148	Exon	PF3D7_1239800	conserved Plasmodium protein, unknown function	nonsynonymous	AAA	GAA	K	E
WRN-P	WRN-1e	Pf3D7_05	201070	C	T	Ts	14	287	Exon	PF3D7_0504800	conserved Plasmodium protein, unknown function	synonymous	GTG	GTA	V	V
WRN-P	WRN-1f	Pf3D7_14	302006	A	G	Ts	0	307	Exon	PF3D7_1408200	transcription factor with AP2 domain ApiAP2	synonymous	CAT	CAC	H	H
WRN-P	WRN-1i	Pf3D7_04	466232	A	C	Tv	0	150	Exon	PF3D7_0410000	conserved Plasmodium protein, unknown function	nonsynonymous	AAT	AAG	N	K
WRN-P	WRN-1j	Pf3D7_04	32767	G	T	Tv	0	368	Exon	PF3D7_0400100	erythrocyte membrane protein 1, PfEMP1 VAR	nonsynonymous	GAG	GAT	E	D
WRN-P	WRN-1j	Pf3D7_11	18932	T	A	Tv	0	322	intergenic	NA	NA	NonCoding	NA	NA	NA	NA
WRN-P	WRN-1j	Pf3D7_12	766371	A	T	Tv	3	45	intergenic	NA	NA	NonCoding	NA	NA	NA	NA
WRN-P	WRN-1k	Pf3D7_13	2905175	C	T	Ts	0	296	intergenic	NA	NA	NonCoding	NA	NA	NA	NA
WRN-1a	WRN-2a	Pf3D7_07	1071346	T	A	Tv	0	22	Intron	PF3D7_0725200	mago nashi protein homolog, putative	NonCoding	NA	NA	NA	NA
WRN-1a	WRN-2b	Pf3D7_11	1799093	T	C	Ts	0	96	Exon	PF3D7_1145300	conserved Plasmodium protein, unknown function	nonsynonymous	AAT	AGT	N	S
WRN-1a	WRN-2d	Pf3D7_06	777530	T	A	Tv	1	10	Intron	PF3D7_0618600	rhomboid protease ROM10	NonCoding	NA	NA	NA	NA
WRN-1a	WRN-2f	Pf3D7_03	638335	C	G	Tv	0	208	Exon	PF3D7_0315700	conserved Plasmodium membrane protein, unknown function	nonsynonymous	GCT	GGT	A	G
WRN-1a	WRN-2g	Pf3D7_08	1443463	T	A	Tv	2	201	intergenic	NA	NA	NonCoding	NA	NA	NA	NA

## Sheet: indels
Parent	Progeny	CHROM	POS	REF	ALT	VQSLOD	ParAD_Ref	ParAD_Alt	ParAF	ProgAD_Ref	ProgAD_Alt	Prog Alt/Ref	Variant	indel_length (bp)	Multiple of 3	Even	indel_Location	Type	Gene ID	Annotation	Upstream sequence	Downstream sequence	homorepeat		Summary of number of micro-indels per clone					Summary of number of micro-indelss per generation
3D7-P	3D7-1a	Pf3D7_04	560515	AATATATAT		4.69	7	0	0	0	20	1	Deletion	-8	FALSE	TRUE	Internal	Intron	PF3D7_0412600	rifin pseudogene	TGTGTATAGTATGCC	ATATATATATATATAT	TA
3D7-P	3D7-1b	Pf3D7_13	2050339	TA	T	4.18	41	0	0	0	83	1	Deletion	-1	FALSE	FALSE	Core	intergenic	NA	NA	CCTTTTAATTTTGTT	AAAAAATAAAAACATC	no		3D7	DEL	INS	Total SV			DEL	INS	Total indel
3D7-P	3D7-1b	Pf3D7_14	2389684	ATATTTATTTATTTATTTATT	ATATTTATTTATT	5.21	10	0	0	0	14	1	Deletion	-8	FALSE	TRUE	Core	intergenic	NA	NA	TAATTATTATACTTC	TATTTATTTATTTATT	no		3D7-2a	1	0	1		3D7-gen2	2	1	3
3D7-P	3D7-1b	Pf3D7_08	267691	ATTCATATATAATATG	A	3.23	15	0	0	0	23	1	Deletion	-15	TRUE	FALSE	Core	Intron	PF3D7_0804500	conserved Plasmodium membrane protein unknown function	TATATATATACATAT	TTCATATATAATATGT	no		3D7-2b	1	1	2		3D7-gen3	2	7	9
3D7-P	3D7-1b	Pf3D7_04	914132	G	GA	3.47	5	0	0	3	6	0.67	Insertion	1	FALSE	FALSE	Core	intergenic	NA	NA	AGAAGCAAAAAGAAG	AAAAAAAAAAGGAAAA	no		3D7-2c	0	0	0		3D7-gen4	7	11	18
3D7-P	3D7-1c	Pf3D7_05	1330704	TTTTA	TTTTATTTA	3.44	19	0	0	1	39	0.98	Insertion	4	FALSE	TRUE	SubTel	Exon	PF3D7_0533000	rifin pseudogene	GTATAGCTCTTATAC	TTTATTTATTTATTTA	no		3D7-2d	0	0	0		Total 3D7	11	19	30
3D7-P	3D7-1c	Pf3D7_14	2429016	AC	A	2.36	56	2	0.03	0	124	1	Deletion	-1	FALSE	FALSE	Core	Exon	PF3D7_1459200	WD repeat-containing protein, putative	TCCAAAGCAGTTGAT	CCCCCCCCTCAGCTTC	no		3D7-2e	0	0	0		BLM-gen2	0	2	2
3D7-P	3D7-1d	Pf3D7_11	1178670	ATATG	A	3.48	20	1	0.05	1	29	0.97	Deletion	-4	FALSE	TRUE	Core	Intron	PF3D7_1130600	conserved Plasmodium protein unknown function	TAAATAAATAAAAAT	TATGTATGTATGTATG	no		3D7-3a	0	0	0		BLM-gen3	5	5	10
3D7-P	3D7-1d	Pf3D7_04	639480	GA	GAA	3.47	16	2	0.11	6	10	0.62	Insertion	1	FALSE	FALSE	Core	intergenic	NA	NA	TTCTTTAGAAAAAAA	AAAAAAAAAAAAAAGG	yes		3D7-3b	1	1	2		BLM-gen4	3	14	17
3D7-P	3D7-1e	Pf3D7_14	1216611	C	CAT	6.03	9	0	0	6	11	0.65	Insertion	2	FALSE	TRUE	Core	intergenic	NA	NA	ATACATACATATGTA	ATATATATATATATAT	TA		3D7-3c	1	1	2		Total ΔPfBLM	8	21	29
3D7-P	3D7-1e	Pf3D7_09	929776	AATTATT	A	4.82	12	0	0	0	55	1	Deletion	-6	TRUE	TRUE	Core	Exon	PF3D7_0922800	conserved Plasmodium protein unknown function	ATTTGATGGGAATAC	ATTATTATTATTATTA	no		3D7-3d	0	1	1		WRN-gen1	26	30	56
3D7-P	3D7-1e	Pf3D7_13	2922952	TG	T	0.807	49	4	0.08	0	28	1	Deletion	-1	FALSE	FALSE	SubTel	intergenic	NA	NA	GGTTTAGGTTTAGGG	GTCAGGGTTCAGGTTC	no		3D7-3e	0	1	1		WRN-gen2	21	19	40
3D7-P	3D7-1f	Pf3D7_10	1047700	ATCATCATTATCATCATCT	A	3.3	62	0	0	0	139	1	Deletion	-18	TRUE	TRUE	Core	Exon	PF3D7_1025000	formin 2 putative	ATTATGAAAATTATC	TCATCATTATCATCAT	no		3D7-3f	0	1	1		Total PfWRN-k/d	47	49	96
3D7-1d	3D7-2a, 3D7-2b	Pf3D7_14	946	CCTGGAAC	CTGGAAC	NA	NA	NA	NA	NA	NA	NA	Deletion	-1	FALSE	FALSE	SubTel	intergenic	NA	NA					3D7-3g	0	2	2
3D7-1d	3D7-2b	Pf3D7_09	434935	TATATTTC	T	7.12	13	0	0	0	24	1	Deletion	-7	FALSE	FALSE	Core	Intron	PF3D7_0909600	conserved Plasmodium protein unknown function	TTATGTTTTATTACA	ATATTTCATATTTCAT	no		3D7-3h	0	0	0
3D7-1d	3D7-2b	Pf3D7_02	696822	CATTATTATT	CATTATTATTATTATT	6.64	22	0	0	1	30	0.97	Insertion	6	TRUE	TRUE	Core	Exon	PF3D7_0216800	conserved Plasmodium membrane protein unknown function	CATTATTATTATGAG	ATTATTATTATTATTA	no		3D7-3i	0	0	0
3D7-2c	3D7-3b	Pf3D7_13	118667	A	AATAT	6.46	6	0	0	0	7	1	Insertion	4	FALSE	TRUE	SubTel	intergenic	NA	NA	ATAAATAAATAAATA	ATATATATATATATAT	TA		3D7-4a	1	2	3
3D7-2c	3D7-3b	Pf3D7_14	458740	AAT	A	5.77	10	0	0	7	15	0.68	Deletion	-2	FALSE	TRUE	Core	intergenic	NA	NA	AATATAAAGAAATAT	ATATATATATATATAT	TA		3D7-4b	2	2	4
3D7-2c	3D7-3c	Pf3D7_12	126730	CATAT	CATATAT	3.88	16	0	0	5	29	0.85	Insertion	2	FALSE	TRUE	Core	Intron	PF3D7_1202300	dynein heavy chain putative	AAAAAAAAAAGGATA	ATATATATATATATAT	TA		3D7-4c	1	1	2
3D7-2c	3D7-3c	Pf3D7_04	1200205	GT	G	0.663	304	0	0	3	9	0.75	Deletion	-1	FALSE	FALSE	SubTel	intergenic	NA	NA	GGTTTAGGGTTTAGG	TTTTAGGTTTTGGGTT	no		3D7-4d	1	2	3
3D7-2c	3D7-3d	Pf3D7_10	1482076	A	ATAT	6.61	52	0	0	0	28	1	Insertion	3	TRUE	FALSE	Core	Exon	PF3D7_1037400	conserved Plasmodium protein unknown function	TCTTTTTTTAAAATG	TATTATTATTATTATT	no		3D7-4e	0	1	1
3D7-2c	3D7-3e	Pf3D7_07	1132262	ATAT	ATATTAT	5.06	56	0	0	40	57	0.59	Insertion	3	TRUE	FALSE	Core	Exon	PF3D7_0726500	ubiquitin carboxyl-terminal hydrolase putative	ATTTTGTCAACATTC	TATTATTATTATTATT	no		3D7-4f	0	2	2
3D7-2c	3D7-3f	Pf3D7_12	1628558	GA	GAA	0.058	7	1	0.12	10	13	0.57	Insertion	1	FALSE	FALSE	Core	intergenic	NA	NA	TATTAATTCAAAAGA	AAAAAAAAAAAAAAAA	yes		3D7-4g	2	1	3
3D7-2c	3D7-3g	Pf3D7_09	1463817	T	TTA	6.73	40	2	0.05	16	41	0.72	Insertion	2	FALSE	TRUE	SubTel	intergenic	NA	NA	TGAACTTTTTCTTCT	TATATATATATATATA	TA		Total	11	19	30
3D7-2c	3D7-3g	Pf3D7_04	656860	A	AAT	8.58	24	0	0	6	21	0.78	Insertion	2	FALSE	TRUE	Core	Intron	PF3D7_0414500	RNA binding protein putative	TTATATACACATTTA	ATATATATATATATAT	TA
3D7-3g	3D7-4a	Pf3D7_14	1211137	GTATA	GTATATATA	5.45	31	2	0.06	0	25	1	Insertion	4	FALSE	TRUE	Core	Intron	PF3D7_1430700	glutamate dehydrogenase putative GDHb	TAAATAAATGAATAT	TATATATATATATATA	TA		ΔPfBLM	DEL	INS	Total SV
3D7-3g	3D7-4a	Pf3D7_14	2765949	TTATA	TTATATA	6.47	15	1	0.06	0	17	1	Insertion	2	FALSE	TRUE	Core	intergenic	NA	NA	AAAAAAAAAAAAATA	TATATATATATATATA	TA		BLM-2a	0	0	0
3D7-3g	3D7-4a	Pf3D7_14	257619	CT	C	0.543	7	0	0	0	5	1	Deletion	-1	FALSE	FALSE	Core	intergenic	NA	NA	ATATATATATTTTTA	TTTTTTTTTTTTTTTT	yes		BLM-2b	0	1	1
3D7-3g	3D7-4b	Pf3D7_07	920938	AATAAAGATAAAGATAAAG	AATAAAGATAAAG	4.07	47	0	0	1	74	0.99	Deletion	-6	TRUE	TRUE	Core	intergenic	NA	NA	AATAAAATAAAATAA	ATAAAGATAAAGATAA	no		BLM-2c	0	0	0
3D7-3g	3D7-4b	Pf3D7_02	440456	AATATAT	AATATATAT	8.58	25	0	0	1	18	0.95	Insertion	2	FALSE	TRUE	Core	intergenic	NA	NA	CTTATACAATATTAT	ATATATATATATATAT	TA		BLM-2d	0	0	0
3D7-3g	3D7-4b, 3D7-4g, 3D7-4e	Pf3D7_01	231442	GAATAAATA	G	2.93	58	5	0.08	3	192	0.98	Deletion	-8	FALSE	TRUE	Core	Intron	PF3D7_0105600	conserved Plasmodium protein unknown function	TTAATATATGTGAAT	AATAAATAAATAAATA	no		BLM-2e	0	1	1
3D7-3g	3D7-4b, 3D7-4g, 3D7-4e	Pf3D7_02	945819	G	C	2.46	344	54	0.14	7	520	0.99	Insertion	0	TRUE	TRUE	SubTel	intergenic	NA	NA	TTGAAGAATGAAGAG	AGGTATGTAAGAGTAA	no		BLM-2f	0	0	0
3D7-3g	3D7-4c	Pf3D7_13	2441895	AATATATATATATATAT	AATATATATATATATATAT	7.45	31	1	0.03	12	16	0.57	Insertion	2	FALSE	TRUE	Core	Intron	PF3D7_1360900	polyadenylate-binding protein putative	AAATATGAAACCCAA	ATATATATATATATAT	TA		BLM-3a	0	1	1
3D7-3g	3D7-4c	Pf3D7_04	794499	GATATAAAAAGTAATCATA	G	3.5	146	0	0	5	269	0.98	Deletion	-18	TRUE	TRUE	Core	Exon	PF3D7_0418000	conserved Plasmodium protein unknown function	AACGAAGATAACCAT	ATATAAAAAGTAATCA	no		BLM-3b	0	0	0
3D7-3g	3D7-4d	Pf3D7_12	1968648	AATATAT	AATATATAT	5.96	25	1	0.04	5	28	0.85	Insertion	2	FALSE	TRUE	Core	Intron	PF3D7_1247800	dipeptidyl peptidase 2 putative DPAP2	ACAATATAAAATTAA	ATATATATATATATAT	TA		BLM-3c	0	0	0
3D7-3g	3D7-4d	Pf3D7_13	1831238	ATATAT	A	9.03	5	0	0	0	6	1	Deletion	-5	FALSE	FALSE	Core	intergenic	NA	NA	GATATGGTATAACTA	TATATTATATTATATT	TA		BLM-3d	0	0	0
3D7-3g	3D7-4d	Pf3D7_05	997852	C	CA	4.39	32	0	0	3	8	0.73	Insertion	1	FALSE	FALSE	Core	intergenic	NA	NA	GTTGGAATGTTGATC	AAAAACGAAAAATAAC	no		BLM-3e	0	0	0
3D7-3g	3D7-4e	Pf3D7_08	924730	A	AT	1.14	9	0	0	4	9	0.69	Insertion	1	FALSE	FALSE	Core	intergenic	NA	NA	TATTATTTTATATAA	TTTTTTTTTTTTTTTT	yes		BLM-3f	2	2	4
3D7-3g	3D7-4f	Pf3D7_10	1099342	CATCATCATT	CATCATCATTATCATCATT	1.08	173	1	0.01	6	210	0.97	Insertion	9	TRUE	FALSE	Core	Exon	PF3D7_1026000	conserved Plasmodium protein unknown function	TATTATTATCATCAT	ATCATCATTATCATCA	no		BLM-3g	0	0	0
3D7-3g	3D7-4f	Pf3D7_13	2113457	C	CAT	7.81	22	5	0.19	2	20	0.91	Insertion	2	FALSE	TRUE	Core	intergenic	NA	NA	TTATTTGTGCATGAA	ATATATATATATATAT	TA		BLM-3h	0	1	1
3D7-3g	3D7-4g	Pf3D7_11	1814827	GAATATGTATTTATA	G	3.62	25	0	0	11	43	0.8	Deletion	-14	FALSE	TRUE	Core	intergenic	NA	NA	AATAGTAGACCACGT	AATATGTATTTATAAA	no		BLM-3i	1	0	1
3D7-3g	3D7-4g	Pf3D7_14	2584717	GATAT	G	2.65	6	0	0	1	17	0.94	Deletion	-4	FALSE	TRUE	Core	Intron	PF3D7_1463900	conserved Plasmodium membrane protein unknown function	ATTTATATATTATAT	ATATATATATATATAT	TA		BLM-3j	2	1	3
3D7-3g	3D7-4g	Pf3D7_12	177200	A	AAAAAAAG	7.03	79	1	0.01	2	13	0.87	Insertion	7	FALSE	FALSE	Core	intergenic	NA	NA	AAATATAAAAAATAA	AAAAAAGAAAAAAGAA	no		BLM-3k	0	0	0
BLM-P	BLM-1a	Pf3D7_11	618232	AT	A	3.11	26	0	0	16	35	0.69	Deletion	-1	FALSE	FALSE	Core	intergenic	NA	NA	ATCATAGTGTATTAT	TATATATATATCATTA	TA		BLM-3l	0	0	0
BLM-P	BLM-1c	Pf3D7_09	1429638	A	AT	1.88	10	2	0.17	2	6	0.75	Insertion	1	FALSE	FALSE	SubTel	intergenic	NA	NA	TATTTTATTTTAATT	TTTTTTTTTTTTTTTA	yes		BLM-4a	2	2	4
BLM-P	BLM-1f	Pf3D7_14	183052	AGAAAATAATCATTGTGAT	A	1.02	49	0	0	0	13	1	Deletion	-18	TRUE	TRUE	Core	Exon	PF3D7_1405300	conserved Plasmodium protein unknown function	AAATAATCATAGTGA	GAAAATAATCATTGTG	no		BLM-4b	0	0	0
BLM-1f	BLM-2b	Pf3D7_11	644231	CATAAATAAATAAATAA	CATAAATAAATAAATAAATAA	4.84	9	0	0	1	31	0.97	Insertion	4	FALSE	TRUE	Core	Intron	PF3D7_1116900	conserved Plasmodium protein unknown function	AAAAAAAAATATATC	ATAAATAAATAAATAA	no		BLM-4c	0	0	0
BLM-1f	BLM-2e	Pf3D7_10	1644200	CT	CTT	2.1	5	0	0	0	17	1	Insertion	1	FALSE	FALSE	SubTel	Intron	PF3D7_1041300	erythrocyte membrane protein 1 PfEMP1 VAR	TAAAATATTTTTCTC	TTTTTTTTTTTTTGTT	yes		BLM-4d	0	0	0
BLM-2a	BLM-3a, BLM-3j	Pf3D7_14	3142389	C	CAT	7.56	24	3	0.11	2	11	0.85	Insertion	2	FALSE	TRUE	SubTel	Intron	PF3D7_1476400	serine%2Fthreonine protein kinase FIKK family pseudoge	ATAAATGAAAATATA	ATATATATATATATAT	TA		BLM-4e	0	0	0
BLM-2a	BLM-3f	Pf3D7_03	1066769	TCTC	T	0.914	0	9	1	0	8	1	Deletion	-3	TRUE	FALSE	SubTel	intergenic	NA	NA	TTCAGGGTTTAGGGT	CTCCGGTTTAGGGTTT	no		BLM-4f	1	2	3
BLM-2a	BLM-3f	Pf3D7_05	37438	C	CAT	5.5	18	2	0.1	1	8	0.89	Insertion	2	FALSE	TRUE	SubTel	Intron	PF3D7_0500500	rifin RIF	AATAATAAAACATTA	ATATATATATATATAT	TA		BLM-4g	0	1	1
BLM-2a	BLM-3f, BLM-3g BLM-3i	Pf3D7_08	1374586	CTGCATGATGAGCATCGGA	C	0.334	249	28	0.1	2	142	0.99	Deletion	-18	TRUE	TRUE	SubTel	Exon	PF3D7_0831800	histidine-rich protein II HRPII	CATGGTGAGCATCAG	TGCATGATGAGCATCG	no		BLM-4h	0	3	3
BLM-2a	BLM-3f, BLM-3g BLM-3i	Pf3D7_05	841668	C	CATAT	5.9	60	3	0.05	0	43	1	Insertion	4	FALSE	TRUE	Core	intergenic	NA	NA	CTTAGCATATTATAA	ATATATATATATATAT	TA		BLM-4i	0	1	1
BLM-2a	BLM-3h	Pf3D7_13	1649842	C	CATATT	7.8	33	1	0.03	0	40	1	Insertion	5	FALSE	FALSE	Core	Intron	PF3D7_1341900	vacuolar ATP synthase subunit d putative	AATAATAATATAAAA	ATATTATATTATATTA	no		BLM-4j	0	1	1
BLM-2a	BLM-3j	Pf3D7_13	747532	A	AAT	6.54	33	0	0	3	43	0.93	Insertion	2	FALSE	TRUE	Core	intergenic	NA	NA	GGTTATATATACATA	ATATATATATATATAT	TA		BLM-4k	0	0	0
BLM-2a	BLM-3j	Pf3D7_10	1291404	AT	A	1.9	7	1	0.12	5	8	0.62	Deletion	-1	FALSE	FALSE	Core	intergenic	NA	NA	GTGAGGACATATAAT	TTTTTTTTTTTTTTTT	yes		BLM-4l	0	4	4
BLM-2a	BLM-3j	Pf3D7_08	1210505	CAT	C	9.52	5	0	0	2	5	0.71	Deletion	-2	FALSE	TRUE	Core	intergenic	NA	NA	TTTATGATAATACAA	ATATATATATATATAT	TA		Total	8	21	29
BLM-2a	BLM-3l	Pf3D7_07	1156369	TATAAATAA	T	7.58	13	0	0	0	35	1	Deletion	-8	FALSE	TRUE	Core	intergenic	NA	NA	TCTTAGCAATTAAAA	ATAAATAAATAAATAA	no
BLM-3j	BLM-4a	Pf3D7_13	931161	CTTTATTTATTTATTTA	CTTTATTTATTTATTTATTTATTTA	4.3	33	0	0	4	128	0.97	Insertion	8	FALSE	TRUE	Core	intergenic	NA	NA	AATTTTTTCATGTTA	TTTATTTATTTATTTA	no
BLM-3j	BLM-4a	Pf3D7_01	342833	T	TTAA	5.67	82	0	0	10	260	0.96	Insertion	3	TRUE	FALSE	Core	Exon	PF3D7_0108300	conserved Plasmodium protein unknown function	TACAGAAGAAATATA	TAATAATAATAATAAT	no		PfWRN-k/d	DEL	INS	Total SV
BLM-3j	BLM-4a	Pf3D7_02	422739	CATAT	CAT	8.76	16	1	0.06	6	9	0.6	Deletion	-2	FALSE	TRUE	Core	intergenic	NA	NA	AAAGGAAAATAAATA	ATATATATATATATAT	TA		WRN-1a	3	2	5
BLM-3j	BLM-4a, BLM-4e BLM-4f BLM-4g BLM-4i BLM-4k BLM-4l	Pf3D7_03	250763	TTTATATATTATATTTTATATA	T	1.03	0	10	1	9	2	0.18	Deletion	-21	TRUE	FALSE	Core	intergenic	NA	NA	TTTTATATATTATAT	TTATATATTATATTTT	TA		WRN-1b	1	0	1
BLM-3j	BLM-4f	Pf3D7_14	972505	AATATATATATATATAT	AATATATATATATATATAT	8.65	6	0	0	9	24	0.73	Insertion	2	FALSE	TRUE	Core	intergenic	NA	NA	CATTCTTGTTTTTGT	ATATATATATATATAT	TA		WRN-1c	2	1	3
BLM-3j	BLM-4f	Pf3D7_14	3148929	GTATA	GTATATA	7.92	5	1	0.17	1	10	0.91	Insertion	2	FALSE	TRUE	SubTel	intergenic	NA	NA	AATCCATATATTAAT	TATATATATATATATA	TA		WRN-1d	0	0	0
BLM-3j	BLM-4f	Pf3D7_07	888235	AAT	A	3.75	32	1	0.03	3	6	0.67	Deletion	-2	FALSE	TRUE	Core	Intron	PF3D7_0720600	conserved Plasmodium protein unknown function	TACATATATATATAT	ATATATATATATATAT	TA		WRN-1e	1	3	4
BLM-3j	BLM-4g	Pf3D7_05	907977	GATATAT	GATATATATAT	2.71	35	3	0.08	25	33	0.57	Insertion	4	FALSE	TRUE	Core	Intron	PF3D7_0522400	conserved Plasmodium protein unknown function	CTGACACAACTATAT	ATATATATATATATAT	TA		WRN-1f	0	1	1
BLM-3j	BLM-4h	Pf3D7_13	2338198	CCTA	CCTACTA	5.58	164	5	0.03	4	171	0.98	Insertion	3	TRUE	FALSE	Core	Exon	PF3D7_1359000	conserved Plasmodium protein unknown function	ATGTTGTTTCCTCGT	CTACTACTACTACTAC	no		WRN-1g	1	8	9
BLM-3j	BLM-4h	Pf3D7_11	1532126	T	TA	2.35	5	0	0	2	5	0.71	Insertion	1	FALSE	FALSE	Core	intergenic	NA	NA	ATCACAAAAAGAGTA	AAAAAAAAAAAAAACA	yes		WRN-1h	0	4	4
BLM-3j	BLM-4h	Pf3D7_09	1294903	CA	CAA	0.802	6	1	0.14	1	5	0.83	Insertion	1	FALSE	FALSE	Core	Intron	PF3D7_0932500	DHHC-type zinc finger protein putative	AAAGGATGTATATAC	AAAAAAAAAAAAAAAA	yes		WRN-1i	1	5	6
BLM-3j	BLM-4i	Pf3D7_01	167	TA	T	0.235	18	1	0.05	7	10	0.59	Deletion	-1	FALSE	FALSE	SubTel	intergenic	NA	NA	CCTAAACCCTAAACC	AAAACCCTGAACCCTA	no		WRN-1j	17	4	21
BLM-3j	BLM-4j	Pf3D7_05	72343	TTATATATATA	T	8.24	12	0	0	0	48	1	Deletion	-10	FALSE	TRUE	Core	intergenic	NA	NA	ATAAAAATGGGAAAA	TATATATATATATATA	TA		WRN-1k	0	2	2
BLM-3j	BLM-4k	Pf3D7_13	368277	AAT	AATAT	4.65	15	1	0.06	13	23	0.64	Insertion	2	FALSE	TRUE	Core	Intron	PF3D7_1308200	carbamoyl phosphate synthetase cpsSII	AAATCTATAAGAACA	ATATATATATATATAT	TA		WRN-2a	2	2	4
BLM-3j	BLM-4k	Pf3D7_11	945745	G	GTA	4.3	17	1	0.06	8	18	0.69	Insertion	2	FALSE	TRUE	Core	Intron	PF3D7_1123900	splicing factor putative	TCTAAACGTATATAT	TATATATATATATATA	TA		WRN-2b	10	5	15
BLM-3j	BLM-4k	Pf3D7_12	1930070	A	AAT	4.69	7	1	0.12	8	18	0.69	Insertion	2	FALSE	TRUE	Core	intergenic	NA	NA	TAATTTGATTATTAT	ATATATATATATATAT	TA		WRN-2c	1	2	3
BLM-3j	BLM-4k	Pf3D7_08	811131	T	TATAC	1.77	114	1	0.01	32	95	0.75	Insertion	4	FALSE	TRUE	Core	Intron	PF3D7_0817700	rhoptry neck protein 5 RON5	GAAAAAAAAAAAAAA	ATACATACATACATAC	yes		WRN-2d	2	2	4
WRN-P	WRN-1a	Pf3D7_02	704	T	TA	0.967	192	3	0.02	0	6	1	Insertion	1	FALSE	FALSE	SubTel	intergenic	NA	NA	CCTAAACCCTAAACC	AACCCTAAACCCTAAA	no		WRN-2e	3	2	5
WRN-P	WRN-1a	Pf3D7_11	294600	AATAATATAATATAATATAATATAAT	AATAATATAATATAATATAATATAATATAAT	8.2	8	0	0	0	9	1	Insertion	5	FALSE	FALSE	Core	Intron	PF3D7_1107100	nucleic acid binding protein putative	ATAAAATAATAAATA	ATAATATAATATAATA	no		WRN-2f	2	1	3
WRN-P	WRN-1a	Pf3D7_14	386306	CT	C	1.4	5	0	0	0	7	1	Deletion	-1	FALSE	FALSE	Core	intergenic	NA	NA	GGTTTTATGTATATT	TTTTTTTTTTTTTTTT	yes		WRN-2g	1	2	3
WRN-P	WRN-1a	Pf3D7_01	167	TA	T	0.235	221	2	0.01	1	5	0.83	Deletion	-1	FALSE	FALSE	SubTel	intergenic	NA	NA	CCTAAACCCTAAACC	AAAACCCTGAACCCTA	no		WRN-2h	0	3	3
WRN-P	WRN-1a	Pf3D7_09	906942	CATATATATATAT	C	6.6	2	14	0.88	10	0	0	Insertion	12	TRUE	TRUE	Core	Intron	PF3D7_0922300	conserved Plasmodium protein unknown function	AAATATATATATGAA	ATATATATATATATAT	TA		Total	47	49	96
WRN-P	WRN-1b	Pf3D7_13	2922952	TG	T	0.807	40	7	0.15	7	10	0.59	Deletion	-1	FALSE	FALSE	SubTel	intergenic	NA	NA	GGTTTAGGTTTAGGG	GTCAGGGTTCAGGTTC	no
WRN-P	WRN-1c	Pf3D7_14	65504	CA	C	3.23	86	6	0.07	5	75	0.94	Deletion	-1	FALSE	FALSE	SubTel	intergenic	NA	NA	AAATAACAAAAATAA	AAAAAAAAAAAAATTT	yes
WRN-P	WRN-1c	Pf3D7_12	250802	TTATA	T	6.95	0	5	1	7	1	0.12	Insertion	4	FALSE	TRUE	Core	Intron	PF3D7_1205600	conserved Plasmodium protein unknown function	AAATATATAAATATG	TATATATATATATATA	TA
WRN-P	WRN-1c	Pf3D7_14	903801	T	C	6.41	223	0	0	9	230	0.96	Deletion	0	TRUE	TRUE	Core	Exon	PF3D7_1422400	conserved Plasmodium protein unknown function	ATAGATGTGATAATA	ATGTGATAATACATGT	no
WRN-P	WRN-1e	Pf3D7_11	420606	A	AAT	7.92	11	0	0	0	10	1	Insertion	2	FALSE	TRUE	Core	intergenic	NA	NA	TAGTTGTCAGTAAAA	ATATATATATATATAT	TA
WRN-P	WRN-1e	Pf3D7_11	1644383	T	TTA	7.28	30	0	0	6	14	0.7	Insertion	2	FALSE	TRUE	Core	intergenic	NA	NA	CAAAGTATATACATA	TATATATATATATATA	TA
WRN-P	WRN-1e	Pf3D7_09	763831	C	CA	5.14	22	0	0	3	34	0.92	Insertion	1	FALSE	FALSE	Core	intergenic	NA	NA	TATGATTTTATAAAT	AAAAAAAAAAAATATA	yes
WRN-P	WRN-1e	Pf3D7_08	908482	AT	A	4.05	15	1	0.06	2	5	0.71	Deletion	-1	FALSE	FALSE	Core	intergenic	NA	NA	ATTTATTTATTATTT	TTTTTTTTTTTTAATG	yes
WRN-P	WRN-1f	Pf3D7_13	431453	A	AAT	5.43	16	0	0	3	13	0.81	Insertion	2	FALSE	TRUE	Core	intergenic	NA	NA	AACAAGTATGTATAT	ATATATATATATATAT	TA
WRN-P	WRN-1g	Pf3D7_05	1015178	C	CAT	4.08	30	1	0.03	3	19	0.86	Insertion	2	FALSE	TRUE	Core	intergenic	NA	NA	AAAAAAATTGTTTTT	ATATATATATATATAT	TA
WRN-P	WRN-1g	Pf3D7_03	203370	CAT	C	5.52	9	1	0.1	0	17	1	Deletion	-2	FALSE	TRUE	Core	intergenic	NA	NA	ACACACTAAAATATA	ATATATATATATATAT	TA
WRN-P	WRN-1g	Pf3D7_13	1849829	CATATATAT	CATATATATAT	3.05	8	0	0	0	10	1	Insertion	2	FALSE	TRUE	Core	Intron	PF3D7_1346300	DNA%2FRNA-binding protein Alba 2 ALBA2	CTACATAAATATATA	ATATATATATATATAT	TA
WRN-P	WRN-1g	Pf3D7_14	333715	AATT	AATTATT	5.45	69	5	0.07	2	111	0.98	Insertion	3	TRUE	FALSE	Core	Exon	PF3D7_1408700	conserved Plasmodium protein unknown function	CTTGATTATTACTAC	ATTATTATTATTATTA	TA
WRN-P	WRN-1g	Pf3D7_14	758664	C	CT	5.9	38	3	0.07	3	41	0.93	Insertion	1	FALSE	FALSE	Core	intergenic	NA	NA	GAATTTCCTTTCCTT	TTTTTTTTTTCTTTTT	no
WRN-P	WRN-1g	Pf3D7_14	2391090	C	CA	1.63	60	7	0.1	11	65	0.86	Insertion	1	FALSE	FALSE	Core	intergenic	NA	NA	AATATAGTCATACAT	AAAAAAAAAAAAAAAA	yes
WRN-P	WRN-1g	Pf3D7_06	1247793	G	GA	1.62	30	4	0.12	12	40	0.77	Insertion	1	FALSE	FALSE	Core	intergenic	NA	NA	TTGTATCATTATAAG	AAAAAAAAAAAAAAAA	yes
WRN-P	WRN-1g	Pf3D7_05	220465	AAT	A	5.5	5	1	0.17	3	6	0.67	Deletion	-2	FALSE	TRUE	Core	intergenic	NA	NA	ATTATAATAATTAGA	ATATATATATATATAT	TA
WRN-P	WRN-1g	Pf3D7_14	2386045	C	CAT	7.8	7	0	0	3	11	0.79	Insertion	2	FALSE	TRUE	Core	intergenic	NA	NA	AACCTTTGTGATTCA	ATATATATATATATAT	TA
WRN-P	WRN-1h	Pf3D7_13	770299	C	CA	2.19	37	4	0.1	9	24	0.73	Insertion	1	FALSE	FALSE	Core	intergenic	NA	NA	CTAATATTACCAAGG	AAAAAAAAAAAAAATA	yes
WRN-P	WRN-1h	Pf3D7_13	1801195	C	CAT	6.73	45	1	0.02	11	41	0.79	Insertion	2	FALSE	TRUE	Core	intergenic	NA	NA	AGTAACATAAGAGCA	ATATATATATATATAT	TA
WRN-P	WRN-1h	Pf3D7_13	2082853	AT	ATT	2.25	64	7	0.1	7	78	0.92	Insertion	1	FALSE	FALSE	Core	Intron	PF3D7_1352200	conserved Plasmodium protein unknown function	TTATTTTATTTATTT	TTTTTTTTTTTTTTTC	yes
WRN-P	WRN-1h	Pf3D7_12	387622	T	TTA	8.01	22	2	0.08	2	19	0.9	Insertion	2	FALSE	TRUE	Core	intergenic	NA	NA	TGACCTAAAATCATA	TATATATATATATATA	TA
WRN-P	WRN-1i	Pf3D7_05	1168159	A	AAT	7.43	20	1	0.05	1	24	0.96	Insertion	2	FALSE	TRUE	Core	intergenic	NA	NA	AATAAAAGATATACC	ATATATATATATATAT	TA
WRN-P	WRN-1i	Pf3D7_05	1331791	C	CAT	6.57	6	0	0	0	7	1	Insertion	2	FALSE	TRUE	SubTel	intergenic	NA	NA	AAAAAAACTTATATA	ATATATATATATATAT	TA
WRN-P	WRN-1i	Pf3D7_11	1389027	G	GTA	1.39	14	0	0	0	7	1	Insertion	2	FALSE	TRUE	Core	intergenic	NA	NA	AATGAAATGAAATGT	TATATATATATATATA	TA
WRN-P	WRN-1i	Pf3D7_09	972080	TTTTTC	T	5.2	20	1	0.05	0	34	1	Deletion	-5	FALSE	FALSE	Core	intergenic	NA	NA	TATATGTTTATATCT	TTTTCTTTTCTTTTCT	no
WRN-P	WRN-1i	Pf3D7_12	415055	G	GA	1.8	59	4	0.06	15	89	0.86	Insertion	1	FALSE	FALSE	Core	intergenic	NA	NA	GATTTTTCCAAAAAA	AAAAAAAAAAAAAAAT	yes
WRN-P	WRN-1i	Pf3D7_02	704	T	TA	0.967	192	3	0.02	1	7	0.88	Insertion	1	FALSE	FALSE	SubTel	intergenic	NA	NA	CCTAAACCCTAAACC	AACCCTAAACCCTAAA	no
WRN-P	WRN-1j	Pf3D7_10	210113	TA	T	3.02	29	4	0.12	6	33	0.85	Deletion	-1	FALSE	FALSE	Core	intergenic	NA	NA	TGTATTATCACTCTT	AAAAAAAAAAAAAAAA	yes
WRN-P	WRN-1j	Pf3D7_10	216986	TA	T	0.46	141	27	0.16	25	163	0.87	Deletion	-1	FALSE	FALSE	Core	Exon	PF3D7_1004600	conserved Plasmodium membrane protein unknown function	CTCCTCTGCCATTGA	AAAAAAAAAAAAAAAT	yes
WRN-P	WRN-1j	Pf3D7_10	470052	TAA	T	0.069	45	2	0.04	11	17	0.61	Deletion	-2	FALSE	TRUE	Core	intergenic	NA	NA	AAATTGTAAATTAAT	AAAAAAAAAAAAAAAA	yes
WRN-P	WRN-1j	Pf3D7_10	1313897	A	AAT	8.76	11	1	0.08	2	15	0.88	Insertion	2	FALSE	TRUE	Core	Intron	PF3D7_1032800	leucine-rich repeat protein LRR1	AAATATAAATAAATA	ATAAATAAATAAATAT	no
WRN-P	WRN-1j	Pf3D7_07	19949	GT	G	1.36	23	3	0.12	1	30	0.97	Deletion	-1	FALSE	FALSE	SubTel	intergenic	NA	NA	TAAAATGTAATTGTT	TTTTTTTTTTTGTTAG	no
WRN-P	WRN-1j	Pf3D7_07	328850	G	GTA	6.9	16	0	0	4	15	0.79	Insertion	2	FALSE	TRUE	Core	intergenic	NA	NA	AAAATGTATTCTTCT	TATATATATATATATA	TA
WRN-P	WRN-1j	Pf3D7_13	2000092	TTATA	TTA	5.28	12	1	0.08	0	15	1	Deletion	-2	FALSE	TRUE	Core	intergenic	NA	NA	TACGTAAATAAAATA	TATATATATATATATA	TA
WRN-P	WRN-1j	Pf3D7_14	65637	G	GAT	5.06	21	2	0.09	4	10	0.71	Insertion	2	FALSE	TRUE	SubTel	intergenic	NA	NA	AAAAAATAGCACATT	ATATATATATATATAT	TA
WRN-P	WRN-1j	Pf3D7_08	1274902	GT	G	4.31	142	9	0.06	10	216	0.96	Deletion	-1	FALSE	FALSE	Core	Exon	PF3D7_0829800	unspecified product	ATAAAATTTGTTCTT	TTTTTTTTTTAATAAA	no
WRN-P	WRN-1j	Pf3D7_08	1409788	AT	A	0.182	94	15	0.14	32	100	0.76	Deletion	-1	FALSE	FALSE	SubTel	intergenic	NA	NA	TTTTTTTTCATTTTA	TTTTTTTTTTTTTTTT	yes
WRN-P	WRN-1j	Pf3D7_08	1443996	AT	A	2.47	56	4	0.07	3	59	0.95	Deletion	-1	FALSE	FALSE	SubTel	intergenic	NA	NA	TATAAACCTTAATAT	TTTTTTTTTTTTCGCT	yes
WRN-P	WRN-1j	Pf3D7_06	786837	AAT	A	8.96	8	1	0.11	1	13	0.93	Deletion	-2	FALSE	TRUE	Core	Intron	PF3D7_0618900	N-acetylglucosamine transferase GPI1	TAGTTACAATAATTA	ATATATATATATATAT	TA
WRN-P	WRN-1j	Pf3D7_02	72081	A	AAT	6.94	13	2	0.13	0	8	1	Insertion	2	FALSE	TRUE	SubTel	intergenic	NA	NA	ATATATGTAATTCTT	ATATATATATATATAT	TA
WRN-P	WRN-1j	Pf3D7_07	303581	CAT	C	6.15	14	1	0.07	0	25	1	Deletion	-2	FALSE	TRUE	Core	intergenic	NA	NA	TATAACCAACTAATA	ATATATATATATATAT	TA
WRN-P	WRN-1j	Pf3D7_07	322468	GA	G	1.9	42	10	0.19	4	73	0.95	Deletion	-1	FALSE	FALSE	Core	intergenic	NA	NA	CTATGCTCGGAATGT	AAAAAAAAAAAAAAAT	yes
WRN-P	WRN-1j	Pf3D7_03	83468	TA	T	4.91	67	7	0.09	3	109	0.97	Deletion	-1	FALSE	FALSE	SubTel	Exon	PF3D7_0301300	epoxide hydrolase 1	AACCAAAACATATGT	AAAAAAAAAAAATGAC	yes
WRN-P	WRN-1j	Pf3D7_13	706548	CATAT	C	8.03	21	4	0.16	1	35	0.97	Deletion	-4	FALSE	TRUE	Core	intergenic	NA	NA	CTTTCCAAACATATA	ATATATATATATATAT	TA
WRN-P	WRN-1j	Pf3D7_13	2824158	CAT	C	6.91	28	1	0.03	4	60	0.94	Deletion	-2	FALSE	TRUE	SubTel	intergenic	NA	NA	ACAAAAAAAAATATA	ATATATATATATATAT	TA
WRN-P	WRN-1j	Pf3D7_01	380633	AT	A	2.65	69	13	0.16	6	112	0.95	Deletion	-1	FALSE	FALSE	Core	intergenic	NA	NA	ATTTCATTTCATTTC	TTTTTTTTTTTTTTAA	yes
WRN-P	WRN-1j	Pf3D7_10	436801	GA	G	0.944	41	7	0.15	12	61	0.84	Deletion	-1	FALSE	FALSE	Core	intergenic	NA	NA	TAAATAAGAAAGGAA	AAAAAAAAAAAAAAAA	yes
WRN-P	WRN-1j	Pf3D7_14	2043728	AT	A	3.14	24	2	0.08	2	22	0.92	Deletion	-1	FALSE	FALSE	Core	intergenic	NA	NA	TTTTTGAAAGCATTA	TTTTTTTTTTTTTTTT	yes
WRN-P	WRN-1k	Pf3D7_11	56883	A	AT	1.64	114	0	0	0	143	1	Insertion	1	FALSE	FALSE	SubTel	Intron	PF3D7_1100700	stevor pseudogene	ATACGAAAGAGTCAA	ATATATATAAGGGTAC	TA
WRN-P	WRN-1k	Pf3D7_04	362356	A	AATAT	7.15	10	2	0.17	0	8	1	Insertion	4	FALSE	TRUE	Core	Intron	PF3D7_0407100	conserved Plasmodium protein unknown function	AAATATAAATATGTA	ATATATATATATATAT	TA
WRN-1a	WRN-2a	Pf3D7_07	1071342	ATTTT	A	8.44	40	1	0.02	0	30	1	Deletion	-4	FALSE	TRUE	Core	Intron	PF3D7_0725200	mago nashi protein homolog putative	TTTATTTATTTATTT	TTTTTTTTTTCATTAG	no
WRN-1a	WRN-2a	Pf3D7_13	1299844	GTATATATA	GTATATATATA	8.32	7	0	0	2	12	0.86	Insertion	2	FALSE	TRUE	Core	intergenic	NA	NA	GAAAAAAATATATAT	TATATATATATATATA	TA
WRN-1a	WRN-2a	Pf3D7_13	1524507	A	AAT	5.05	14	0	0	4	11	0.73	Insertion	2	FALSE	TRUE	Core	intergenic	NA	NA	TTTTGTATTATATTA	ATATATATATATATAT	TA
WRN-1a	WRN-2a	Pf3D7_13	525568	GTATA	GTA	5.07	13	1	0.07	5	8	0.62	Deletion	-2	FALSE	TRUE	Core	intergenic	NA	NA	ATATAATCACTAATA	TATATATATATATATA	TA
WRN-1a	WRN-2b	Pf3D7_12	216263	A	AAT	5.11	8	1	0.11	1	8	0.89	Insertion	2	FALSE	TRUE	Core	intergenic	NA	NA	AAATACAAATATATA	ATATATATATATATAT	TA
WRN-1a	WRN-2b, WRN-2d	Pf3D7_05	1168159	A	AAT	7.43	38	1	0.03	8	16	0.67	Insertion	2	FALSE	TRUE	Core	intergenic	NA	NA	AATAAAAGATATACC	ATATATATATATATAT	TA
WRN-1a	WRN-2b, WRN-2d	Pf3D7_14	1446724	AATATAT	AATATATAT	8.84	11	1	0.08	2	12	0.86	Insertion	2	FALSE	TRUE	Core	Intron	PF3D7_1435700.1	conserved Plasmodium protein unknown function	ATATATACATGCATA	ATATATATATATATAT	TA
WRN-1a	WRN-2b, WRN-2d	Pf3D7_12	970584	GA	G	7.13	64	2	0.03	2	56	0.97	Deletion	-1	FALSE	FALSE	Core	intergenic	NA	NA	TTATATTTTTTTAAG	AAAAAAAAAATAAGTA	no
WRN-1a	WRN-2b, WRN-2d	Pf3D7_08	1229177	AT	A	5.08	124	0	0	0	95	1	Deletion	-1	FALSE	FALSE	Core	intergenic	NA	NA	TATTGGACACTATAT	TTTTTTTTTTCTCTTT	no
WRN-1a	WRN-2b, WRN-2d	Pf3D7_06	1113032	A	AT	3.89	19	3	0.14	2	20	0.91	Insertion	1	FALSE	FALSE	Core	intergenic	NA	NA	TTTATATATTTTATT	TTTTTTTTTTTTTTTA	yes
WRN-1a	WRN-2b, WRN-2d	Pf3D7_06	1199721	C	CA	1.64	18	1	0.05	2	7	0.78	Insertion	1	FALSE	FALSE	Core	intergenic	NA	NA	TACATATATGTATGA	AAAAAAAAAAAAAAAT	yes
WRN-1a	WRN-2b, WRN-2d	Pf3D7_04	672758	GT	G	0.537	197	6	0.03	17	131	0.89	Deletion	-1	FALSE	FALSE	Core	Exon	PF3D7_0415200	conserved Plasmodium protein unknown function	ATTAATTTGTATATT	TTTTTTTTTTTTGTTT	yes
WRN-1a	WRN-2b, WRN-2d	Pf3D7_04	936382	GT	G	3.71	135	0	0	0	146	1	Deletion	-1	FALSE	FALSE	Internal	Intron	PF3D7_0420700	erythrocyte membrane protein 1 PfEMP1 VAR	TATGTAGGTATGTAG	TTTGTGAATGTATATG	no
WRN-1a	WRN-2b, WRN-2d	Pf3D7_05	637796	GT	G	2.49	75	10	0.12	9	73	0.89	Deletion	-1	FALSE	FALSE	Core	Intron	PF3D7_0515400	conserved Plasmodium protein unknown function	TATGTGTGTGTGTGT	TTTTTTTTTTTTTTTC	yes
WRN-1a	WRN-2b, WRN-2d	Pf3D7_05	1135270	CT	C	5.94	12	1	0.08	1	8	0.89	Deletion	-1	FALSE	FALSE	Core	intergenic	NA	NA	CCATATTTAATTTAC	TTTTTTTTTTTTTATA	yes
WRN-1a	WRN-2b, WRN-2d	Pf3D7_14	504605	AT	A	2.54	25	1	0.04	2	14	0.88	Deletion	-1	FALSE	FALSE	Core	intergenic	NA	NA	TAATATGTAATTTAA	TTTTTTTTTTTTTTTT	yes
WRN-1a	WRN-2b, WRN-2d	Pf3D7_14	3161632	GTA	G	9.11	17	2	0.11	3	26	0.9	Deletion	-2	FALSE	TRUE	SubTel	intergenic	NA	NA	TTTGAATATATATTT	TATATATATATATATA	TA
WRN-1a	WRN-2b, WRN-2d	Pf3D7_12	166692	GA	G	3.19	53	4	0.07	7	52	0.88	Deletion	-1	FALSE	FALSE	Core	intergenic	NA	NA	TCATTAAATGTGTGA	AAAAAAAAAAAAAAGA	yes
WRN-1a	WRN-2b, WRN-2d	Pf3D7_02	602950	AT	A	4.16	26	4	0.13	1	16	0.94	Deletion	-1	FALSE	FALSE	Core	intergenic	NA	NA	ATTTGTAAATTGGGG	TTTTTTTTTTTTTTCT	yes
WRN-1a	WRN-2c	Pf3D7_14	3165362	T	TTTTA	7.68	18	0	0	0	19	1	Insertion	4	FALSE	TRUE	SubTel	intergenic	NA	NA	TAATGAGATAAAGAG	TTTATTTATTTATTTA	no
WRN-1a	WRN-2c	Pf3D7_06	1367096	C	CAT	2.91	15	0	0	5	16	0.76	Insertion	2	FALSE	TRUE	SubTel	intergenic	NA	NA	AAAAAAATATATATG	ATATATATATATATAT	TA
WRN-1a	WRN-2c	Pf3D7_07	120131	A	AAAT	4.72	0	24	1	0	19	1	Deletion	-3	TRUE	FALSE	Core	Exon	PF3D7_0703000	conserved Plasmodium protein unknown function	AGAAAATATTAACAC	AATAATAATAATAATA	no
WRN-1a	WRN-2d	Pf3D7_03	941414	G	GTA	7.92	51	4	0.07	6	21	0.78	Insertion	2	FALSE	TRUE	Core	intergenic	NA	NA	AGATTATATATAAAG	TATATATATATATATA	TA
WRN-1a	WRN-2d	Pf3D7_14	1398811	TTTATTATTA	TTTATTATTATTA	6.53	97	0	0	5	71	0.93	Insertion	3	TRUE	FALSE	Core	Exon	PF3D7_1434500	dynein-related AAA-type ATPase putative	ATGTATTTTATGTAT	TTATTATTATTATTAT	no
WRN-1a	WRN-2d	Pf3D7_12	854397	AAT	A	8.85	5	0	0	0	7	1	Deletion	-2	FALSE	TRUE	Core	Intron	PF3D7_1221300	conserved Plasmodium protein unknown function	TAAATAAATAATAAA	ATATATATATATATAT	TA
WRN-1a	WRN-2d	Pf3D7_13	1423660	AT	A	0.683	152	24	0.14	31	112	0.78	Deletion	-1	FALSE	FALSE	Core	intergenic	NA	NA	TTTTTTAATATTTCC	TTTTTTTTTTTTTTTT	yes
WRN-1a	WRN-2e	Pf3D7_03	295507	C	CAT	7.06	30	2	0.06	1	15	0.94	Insertion	2	FALSE	TRUE	Core	Intron	PF3D7_0306300	glutaredoxin 1 GRX1	TATCCTACATTTAAT	ATATATATATATATAT	TA
WRN-1a	WRN-2e	Pf3D7_13	928979	GATTATATTATATTATATTAT	GGATTATATTATATTAT	5.75	25	0	0	0	47	1	Deletion	-4	FALSE	TRUE	Core	Intron	PF3D7_1322100	SET domain protein putative SET2	TTTTATTTATTTGTT	ATTATATTATATTATA	no
WRN-1a	WRN-2e	Pf3D7_09	186986	C	CAT	6.98	10	2	0.17	3	14	0.82	Insertion	2	FALSE	TRUE	Core	intergenic	NA	NA	CAAGAGTTTTTATTA	ATATATATATATATAT	TA
WRN-1a	WRN-2e	Pf3D7_08	1049711	CTTATTATTATTATTATTATTA	CTTATTATTATTATTA	4.86	48	0	0	0	38	1	Deletion	-6	TRUE	TRUE	Core	Exon	PF3D7_0824000	conserved Plasmodium protein unknown function	TCTACTAAGAATTTT	TTATTATTATTATTAT	no
WRN-1a	WRN-2e	Pf3D7_10	691178	CATATATATAT	C	5.84	9	0	0	2	6	0.75	Deletion	-10	FALSE	TRUE	Core	intergenic	NA	NA	ACTTAAATATAATCA	ATATATATATATATAT	TA
WRN-1a	WRN-2f	Pf3D7_03	894594	TTA	TTATA	5.65	18	3	0.14	6	15	0.71	Insertion	2	FALSE	TRUE	Core	intergenic	NA	NA	TTTTATGGTATATAT	TATATATATATATATA	TA
WRN-1a	WRN-2f	Pf3D7_09	293015	ATTTAT	A	4.31	25	0	0	19	26	0.58	Deletion	-5	FALSE	FALSE	Core	intergenic	NA	NA	ATATATTATTAATTT	TTTATTTTATTTTATT	no
WRN-1a	WRN-2f	Pf3D7_02	223389	TTTTTC	T	5.82	104	0	0	0	62	1	Deletion	-5	FALSE	FALSE	Core	intergenic	NA	NA	CATATATTACCTCTT	TTTTCTTTTCTTTTCT	no
WRN-1a	WRN-2g	Pf3D7_14	1615638	AAT	AATAT	9.66	11	1	0.08	2	10	0.83	Insertion	2	FALSE	TRUE	Core	intergenic	NA	NA	TCATATAAATAAATA	ATATATATATATATAT	TA
WRN-1a	WRN-2g	Pf3D7_12	1472845	AAATAAT	A	4.81	119	0	0	0	134	1	Deletion	-6	TRUE	TRUE	Core	Exon	PF3D7_1235300	CCR4-NOT transcription complex subunit 4 putative NOT4	TAATAACACCAGCAA	AATAATAATAATAATA	TA
WRN-1a	WRN-2g	Pf3D7_04	170289	C	CAT	2.83	77	7	0.08	20	37	0.65	Insertion	2	FALSE	TRUE	SubTel	Exon	PF3D7_0402800	erythrocyte membrane protein 1 PfEMP1 pseudogene	AAGGTAATTAACACA	ATATATATATATATAT	TA
WRN-1a	WRN-2h	Pf3D7_12	191947	C	CAT	8.04	34	1	0.03	4	15	0.79	Insertion	2	FALSE	TRUE	Core	Exon	PF3D7_1203800	unspecified product	ATATATAACAATTTA	ATATATATATATATAT	TA
WRN-1a	WRN-2h	Pf3D7_11	1120012	G	GAT	4.21	20	2	0.09	6	14	0.7	Insertion	2	FALSE	TRUE	Core	Intron	PF3D7_1128900	conserved Plasmodium protein unknown function	ATAAATAATGAAATG	ATATATATATATATAT	TA
WRN-1a	WRN-2h	Pf3D7_14	906833	C	CAT	2.71	14	2	0.12	7	16	0.7	Insertion	2	FALSE	TRUE	Core	Intron	PF3D7_1422500	ubiquitin ligase putative HRD1	ACACACACACACACA	ATATATATATATATAT	TA

## Sheet: StructuralVariants
Parent	Progeny	CHROM	POS_start	SV1_location	CHROM2	POS_end	SV2_location	size	svtype	refgq	altgq	Ref_ratio	Alt_ratio	SV_ID		Summary of number of Structural Variants per clone									Summary of number of Structural Variants per generation
3D7-1d	3D7-2a	Pf3D7_09	21026	SubtelomericHypervariable	Pf3D7_09	1502374	SubtelomericHypervariable	1481349	INV	63	10000	0	0.764706	3D7-2a_1
3D7-1d	3D7-2a	Pf3D7_01	611359	SubtelomericHypervariable	Pf3D7_03	1063368	SubtelomericRepeat	0	TRA	10000	10000	0	0.389831	3D7-2a_2		3D7	DEL	DUP	INV	TRA	Total SV	var Ex1				DEL	DUP	INV	TRA	Total SV	SV in var exon1
3D7-1d	3D7-2b	Pf3D7_01	10493	SubtelomericRepeat	Pf3D7_03	12637	SubtelomericRepeat	0	TRA	10000	0	0	0	3D7-2b_1		3D7-2a	0	0	1	1	2	2			3D7-gen2	0	1	1	2	4	3
3D7-1d	3D7-2b	Pf3D7_01	11142	SubtelomericRepeat	Pf3D7_03	13632	SubtelomericRepeat	0	TRA	144	10000	0	0.679825	3D7-2b_1		3D7-2b	0	0	0	1	1				3D7-gen3	0	0	0	8	8	4
3D7-1d	3D7-2b	Pf3D7_01	11184	SubtelomericRepeat	Pf3D7_03	13711	SubtelomericRepeat	0	TRA	108	10000	0	0.639752	3D7-2b_1		3D7-2c	0	0	0	0	0				3D7-gen4	0	0	0	1	1	1
3D7-1d	3D7-2d	Pf3D7_07	559100	InternalHypervariable	Pf3D7_07	574322	InternalHypervariable	15223	DUP	123	10000	0	0.461279	3D7-2d_1		3D7-2d	0	1	0	0	1	1			Total 3D7	0	1	1	11	13	8
3D7-2c	3D7-3a	Pf3D7_09	50470	SubtelomericHypervariable	Pf3D7_09	62123	SubtelomericHypervariable	11654	DEL	78	10000	0	0.429688	3D7-3a_1		3D7-2e	0	0	0	0	0				BLM-gen2	1	1	0	1	3	0
3D7-2c	3D7-3a	Pf3D7_09	50185	SubtelomericHypervariable	Pf3D7_09	61827	SubtelomericHypervariable	11643	DUP	154	10000	0	0.328358	3D7-3a_1		3D7-3a	0	0	0	1	1	1			BLM-gen3	1	1	0	6	8	0
3D7-2c	3D7-3b	Pf3D7_04	26420	SubtelomericRepeat	Pf3D7_03	34907	SubtelomericHypervariable	0	TRA	81	10000	0	0.16	3D7-3b_1		3D7-3b	0	0	0	1	1	1			BLM-gen4	0	5	1	11	17	2
3D7-2c	3D7-3b	Pf3D7_04	27707	SubtelomericHypervariable	Pf3D7_03	35965	SubtelomericHypervariable	0	TRA	45	10000	0	0.536842	3D7-3b_1		3D7-3c	0	0	0	0	0				Total ΔPfBLM	2	7	1	18	28	2
3D7-2c	3D7-3b	Pf3D7_04	33661	SubtelomericHypervariable	Pf3D7_08	24769	SubtelomericHypervariable	0	TRA	90	55	0	0.116667	3D7-3b_1		3D7-3d	0	0	0	0	0				WRN-gen1	14	7	1	33	55	9
3D7-2c	3D7-3b	Pf3D7_04	37264	SubtelomericHypervariable	Pf3D7_08	28215	SubtelomericHypervariable	0	TRA	60	0	0.102941	0	3D7-3b_1		3D7-3e	0	0	0	3	3				WRN-gen2	14	11	1	11	37	8
3D7-2c	3D7-3e	Pf3D7_12	12129	SubtelomericRepeat	Pf3D7_01	624406	SubtelomericRepeat	0	TRA	18	10000	0	0.366197	3D7-3e_1		3D7-3f	0	0	0	2	2	2			Total PfWRN-k/d	28	18	2	44	92	17
3D7-2c	3D7-3e	Pf3D7_06	1411789	SubtelomericRepeat	Pf3D7_09	1535670	SubtelomericRepeat	0	TRA	10000	10000	0	0.232099	3D7-3e_2		3D7-3g	0	0	0	1	1
3D7-2c	3D7-3e	Pf3D7_06	1416816	SubtelomericRepeat	Pf3D7_05	1318357	Core	0	TRA	10000	21	0	0.103306	3D7-3e_3		3D7-3h	0	0	0	0	0
3D7-2c	3D7-3f	Pf3D7_13	35747	SubtelomericHypervariable	Pf3D7_13	2923117	SubtelomericRepeat	2887371	INV	84	10000	0	0.384083	3D7-3f_1		3D7-3i	0	0	0	0	0
3D7-2c	3D7-3f	Pf3D7_04	35242	SubtelomericHypervariable	Pf3D7_13	35934	SubtelomericHypervariable	0	TRA	99	10000	0	0.700315	3D7-3f_1		3D7-4a	0	0	0	0	0
3D7-2c	3D7-3f	Pf3D7_04	60208	SubtelomericHypervariable	Pf3D7_13	31226	SubtelomericHypervariable	0	TRA	87	0	0	0	3D7-3f_2		3D7-4b	0	0	0	0	0
3D7-2c	3D7-3gP	Pf3D7_12	2266569	SubtelomericRepeat	Pf3D7_01	6147	SubtelomericRepeat	0	TRA	10000	76	0	0.170213	3D7-3gP_1		3D7-4c	0	0	0	0	0
3D7-2c	3D7-3gP	Pf3D7_08	4649	SubtelomericRepeat	Pf3D7_12	2267510	SubtelomericRepeat	0	TRA	10000	0	0.12	0	3D7-3gP_1		3D7-4d	0	0	0	0	0
3D7-2c	3D7-3gP	Pf3D7_08	5442	SubtelomericRepeat	Pf3D7_12	2266781	SubtelomericRepeat	0	TRA	10000	10000	0	0.44186	3D7-3gP_1		3D7-4e	0	0	0	0	0
3D7-3g	3D7-4g	Pf3D7_04	32671	SubtelomericHypervariable	Pf3D7_08	24007	SubtelomericHypervariable	0	TRA	135	10000	0	0.127389	3D7-4g_1		3D7-4f	0	0	0	0	0
BLM-1f	BLM-2aP	Pf3D7_06	1389107	SubtelomericRepeat	Pf3D7_06	1402637	SubtelomericRepeat	13531	DEL	21	0	0.125	0	BLM-2aP_1		3D7-4g	0	0	0	1	1	1
BLM-1f	BLM-2f	Pf3D7_08	1447642	SubtelomericRepeat	Pf3D7_08	1458817	SubtelomericRepeat	11176	DUP	78	10000	0	0.151351	BLM-2f_1		Total	0	1	1	11	13	8
BLM-1f	BLM-2f	Pf3D7_12	3	SubtelomericRepeat	Pf3D7_11	2037270	SubtelomericRepeat	0	TRA	12	41	0	0.172414	BLM-2f_2
BLM-2a	BLM-3f	Pf3D7_11	98596	SubtelomericHypervariable	Pf3D7_11	99005	SubtelomericHypervariable	410	DEL	48	0	0.111111	0	BLM-3f_1		ΔPfBLM	DEL	DUP	INV	TRA	Total SV	var Ex1
BLM-2a	BLM-3f	Pf3D7_01	618106	SubtelomericRepeat	Pf3D7_03	1042496	SubtelomericRepeat	0	TRA	69	10000	0	0.205882	BLM-3f_2		BLM-2a	1	0	0	0	1
BLM-2a	BLM-3f	Pf3D7_06	1391287	SubtelomericRepeat	Pf3D7_03	1042499	SubtelomericRepeat	0	TRA	60	10000	0	0.44186	BLM-3f_3		BLM-2b	0	0	0	0	0
BLM-2a	BLM-3f	Pf3D7_06	1391307	SubtelomericRepeat	Pf3D7_01	618063	SubtelomericRepeat	0	TRA	120	41	0	0.142857	BLM-3f_3		BLM-2c	0	0	0	0	0
BLM-2a	BLM-3f	Pf3D7_02	926441	SubtelomericRepeat	Pf3D7_03	1047460	SubtelomericRepeat	0	TRA	99	10000	0	0.44702	BLM-3f_4		BLM-2d	0	0	0	0	0
BLM-2a	BLM-3g	Pf3D7_12	25232	SubtelomericHypervariable	Pf3D7_10	1686837	SubtelomericRepeat	0	TRA	12	54	0	0.705882	BLM-3g_2		BLM-2e	0	0	0	0	0
BLM-2a	BLM-3g	Pf3D7_02	855448	Core	Pf3D7_03	2105	SubtelomericRepeat	0	TRA	48	0	0	0	BLM-3g_3		BLM-2f	0	1	0	1	2
BLM-2a	BLM-3i	Pf3D7_12	25240	SubtelomericHypervariable	Pf3D7_10	1686843	SubtelomericRepeat	0	TRA	12	10000	0	0.325581	BLM-3i_2		BLM-3a	0	0	0	0	0
BLM-2a	BLM-3jP	Pf3D7_10	1662008	SubtelomericRepeat	Pf3D7_10	1675777	SubtelomericRepeat	13770	DUP	69	10000	0	0.380435	BLM-3jP_1		BLM-3b	0	0	0	0	0
BLM-2a	BLM-3jP	Pf3D7_03	18647	SubtelomericRepeat	Pf3D7_10	1675790	SubtelomericRepeat	0	TRA	117	10000	0	0.226027	BLM-3jP_1		BLM-3c	0	0	0	0	0
BLM-2a	BLM-3k	Pf3D7_02	934089	SubtelomericRepeat	Pf3D7_11	17898	SubtelomericRepeat	0	TRA	123	10000	0	0.392371	BLM-3k_1		BLM-3d	0	0	0	0	0
BLM-3j	BLM-4c	Pf3D7_07	18192	SubtelomericHypervariable	Pf3D7_10	1615611	SubtelomericHypervariable	0	TRA	18	10000	0	0.61745	BLM-4c_1		BLM-3e	0	0	0	0	0
BLM-3j	BLM-4d	Pf3D7_07	572372	InternalHypervariable	Pf3D7_07	595796	InternalHypervariable	23425	DUP	54	10000	0	0.467914	BLM-4d_1		BLM-3f	1	0	0	3	4
BLM-3j	BLM-4d	Pf3D7_09	4171	SubtelomericRepeat	Pf3D7_13	2916176	SubtelomericRepeat	0	TRA	12	10000	0	0.465517	BLM-4d_2		BLM-3g	0	0	0	2	2
BLM-3j	BLM-4e	Pf3D7_13	2895802	SubtelomericRepeat	Pf3D7_13	2902987	SubtelomericRepeat	7186	DEL	51	10000	0	0.375796	BLM-4e_1		BLM-3h	0	0	0	0	0
BLM-3j	BLM-4e	Pf3D7_13	2896639	SubtelomericRepeat	Pf3D7_13	2903531	SubtelomericRepeat	6893	DUP	60	10000	0	0.393407	BLM-4e_1		BLM-3i	0	0	0	0	0
BLM-3j	BLM-4e	Pf3D7_06	36213	SubtelomericHypervariable	Pf3D7_06	39456	SubtelomericHypervariable	3244	DUP	33	46	0	0.112745	BLM-4e_2		BLM-3j	0	1	0	0	1
BLM-3j	BLM-4f	Pf3D7_08	1464913	SubtelomericRepeat	Pf3D7_11	7635	SubtelomericRepeat	0	TRA	111	10000	0	0.366864	BLM-4f_1		BLM-3k	0	0	0	1	1
BLM-3j	BLM-4f	Pf3D7_08	1465072	SubtelomericRepeat	Pf3D7_11	7356	SubtelomericRepeat	0	TRA	99	10000	0	0.377907	BLM-4f_1		BLM-3l	0	0	0	0	0
BLM-3j	BLM-4g	Pf3D7_03	1044482	SubtelomericRepeat	Pf3D7_03	1046829	SubtelomericRepeat	2348	DUP	81	10000	0	0.311721	BLM-4g_1		BLM-4a	0	0	0	0	0
BLM-3j	BLM-4g	Pf3D7_12	6378	SubtelomericRepeat	Pf3D7_12	2265372	SubtelomericRepeat	2258995	INV	33	10000	0	0.178571	BLM-4g_2		BLM-4b	0	0	0	0	0
BLM-3j	BLM-4h	Pf3D7_10	1664754	SubtelomericRepeat	Pf3D7_10	1673155	SubtelomericRepeat	8402	DUP	66	10000	0	0.304481	BLM-4h_1		BLM-4c	0	0	0	1	1
BLM-3j	BLM-4h	Pf3D7_10	1669329	SubtelomericRepeat	Pf3D7_10	1676564	SubtelomericRepeat	7236	DUP	75	10000	0	0.353448	BLM-4h_1		BLM-4d	0	1	0	1	2	1
BLM-3j	BLM-4h	Pf3D7_12	2265878	SubtelomericRepeat	Pf3D7_14	883	SubtelomericRepeat	0	TRA	114	10000	0	0.798995	BLM-4h_2		BLM-4e	0	2	0	0	2
BLM-3j	BLM-4h	Pf3D7_04	11930	SubtelomericRepeat	Pf3D7_03	1065610	SubtelomericRepeat	0	TRA	68	0	0	0	BLM-4h_3		BLM-4f	0	0	0	1	1
BLM-3j	BLM-4h	Pf3D7_07	1278	SubtelomericRepeat	Pf3D7_10	597	SubtelomericRepeat	0	TRA	10000	29	0	0.190476	BLM-4h_4		BLM-4g	0	1	1	0	2
BLM-3j	BLM-4i	Pf3D7_03	1065456	SubtelomericRepeat	Pf3D7_05	1343029	SubtelomericRepeat	0	TRA	34	68	0	0.714286	BLM-4i_1		BLM-4h	0	1	0	3	4
BLM-3j	BLM-4i	Pf3D7_12	2239398	SubtelomericHypervariable	Pf3D7_09	33571	SubtelomericHypervariable	0	TRA	48	10000	0	0.169725	BLM-4i_2		BLM-4i	0	0	0	3	3
BLM-3j	BLM-4i	Pf3D7_02	61858	SubtelomericHypervariable	Pf3D7_01	58392	SubtelomericHypervariable	0	TRA	23	10000	0	0.622517	BLM-4i_3		BLM-4j	0	0	0	0	0
BLM-3j	BLM-4k	Pf3D7_01	612314	SubtelomericHypervariable	Pf3D7_13	2889681	SubtelomericHypervariable	0	TRA	99	10000	0	0.508532	BLM-4k_1		BLM-4k	0	0	0	1	1	1
BLM-3j	BLM-4k	Pf3D7_12	19708	SubtelomericHypervariable	Pf3D7_01	611899	SubtelomericHypervariable	0	TRA	129	10000	0	0.214286	BLM-4k_1		BLM-4l	0	0	0	1	1
BLM-3j	BLM-4k	Pf3D7_12	19972	SubtelomericHypervariable	Pf3D7_01	611735	SubtelomericHypervariable	0	TRA	138	10000	0	0.239234	BLM-4k_1		Total	2	7	1	18	28	2
BLM-3j	BLM-4l	Pf3D7_06	1406478	SubtelomericRepeat	Pf3D7_10	9435	SubtelomericRepeat	0	TRA	61	0	0.172932	0	BLM-4l_1
BLM-3j	BLM-4l	Pf3D7_02	937840	SubtelomericRepeat	Pf3D7_10	9921	SubtelomericRepeat	0	TRA	21	10000	0	0.816406	BLM-4l_1		PfWRN-k/d	DEL	DUP	INV	TRA	Total SV	var Ex1
WRN-P	WRN-1a	Pf3D7_10	1524029	Core	Pf3D7_10	1527600	Core	3572	DEL	10000	10000	0	0.777778	WRN-1a_1		WRN-1a	3	0	0	2	5	0
WRN-P	WRN-1a	Pf3D7_11	98304	SubtelomericHypervariable	Pf3D7_11	99504	SubtelomericHypervariable	1201	DEL	10000	10000	0	0.431579	WRN-1a_2		WRN-1b	1	1	0	7	9	2
WRN-P	WRN-1a	Pf3D7_06	57495	SubtelomericHypervariable	Pf3D7_06	62730	SubtelomericHypervariable	5236	DEL	10000	10000	0.00775194	0.373333	WRN-1a_3		WRN-1c	6	1	0	2	9	0
WRN-P	WRN-1a	Pf3D7_06	58038	SubtelomericHypervariable	Pf3D7_06	62670	SubtelomericHypervariable	4633	DEL	10000	117	0	0.776119	WRN-1a_3		WRN-1d	1	0	0	2	3
WRN-P	WRN-1a	Pf3D7_08	6597	SubtelomericRepeat	Pf3D7_11	7764	SubtelomericRepeat	0	TRA	10000	10000	0	0.294118	WRN-1a_4		WRN-1e	1	0	0	1	2	1
WRN-P	WRN-1a	Pf3D7_04	39504	SubtelomericHypervariable	Pf3D7_10	1643056	SubtelomericHypervariable	0	TRA	10000	10000	0	0.728972	WRN-1a_5		WRN-1f	0	2	0	2	4	1
WRN-P	WRN-1a	Pf3D7_04	39611	SubtelomericHypervariable	Pf3D7_10	1642894	SubtelomericHypervariable	0	TRA	10000	10000	0	0.245989	WRN-1a_5		WRN-1g	0	0	1	4	5	2
WRN-P	WRN-1b	Pf3D7_11	1624326	Core	Pf3D7_11	1624777	Core	452	DEL	10000	0	0	0	WRN-1b_1		WRN-1h	0	1	0	5	6	3
WRN-P	WRN-1b	Pf3D7_04	964812	InternalHypervariable	Pf3D7_04	975805	InternalHypervariable	10994	DEL	10000	10000	0	0.363218	WRN-1b_2		WRN-1i	1	1	0	2	4
WRN-P	WRN-1b	Pf3D7_04	965154	InternalHypervariable	Pf3D7_04	976109	InternalHypervariable	10956	DUP	10000	10000	0	0.360784	WRN-1b_2		WRN-1j	2	1	0	1	4
WRN-P	WRN-1b	Pf3D7_03	9009	SubtelomericRepeat	Pf3D7_07	1440446	SubtelomericRepeat	0	TRA	10000	10000	0	0.433333	WRN-1b_3		WRN-1k	0	0	0	5	5
WRN-P	WRN-1b	Pf3D7_09	5217	SubtelomericRepeat	Pf3D7_03	9009	SubtelomericRepeat	0	TRA	10000	10000	0	0.553719	WRN-1b_3		WRN-2a	0	0	0	1	1
WRN-P	WRN-1b	Pf3D7_12	222	SubtelomericRepeat	Pf3D7_13	2924991	SubtelomericRepeat	0	TRA	133	76	0	0.136364	WRN-1b_4		WRN-2b	1	2	1	0	4
WRN-P	WRN-1b	Pf3D7_12	1796	SubtelomericRepeat	Pf3D7_10	1932	SubtelomericRepeat	0	TRA	21	10000	0	0.685714	WRN-1b_5		WRN-2c	3	2	0	3	8	2
WRN-P	WRN-1b	Pf3D7_12	6207	SubtelomericRepeat	Pf3D7_03	9009	SubtelomericRepeat	0	TRA	10000	10000	0	0.310345	WRN-1b_3		WRN-2d	2	1	0	0	3
WRN-P	WRN-1b	Pf3D7_12	2268372	SubtelomericRepeat	Pf3D7_11	4155	SubtelomericRepeat	0	TRA	10000	10000	0	0.609375	WRN-1b_6		WRN-2e	4	2	0	0	6	1
WRN-P	WRN-1b	Pf3D7_08	80296	Core	Pf3D7_14	264	SubtelomericRepeat	0	TRA	10000	0	0	0	WRN-1b_7		WRN-2f	2	1	0	2	5	1
WRN-P	WRN-1b	Pf3D7_08	80297	Core	Pf3D7_13	478	SubtelomericRepeat	0	TRA	10000	10000	0	0.642045	WRN-1b_7		WRN-2g	0	1	0	5	6	3
WRN-P	WRN-1b	Pf3D7_08	80298	Core	Pf3D7_03	1067116	SubtelomericRepeat	0	TRA	10000	10000	0	0.677019	WRN-1b_7		WRN-2h	1	2	0	0	3	1
WRN-P	WRN-1b	Pf3D7_04	965154	InternalHypervariable	Pf3D7_07	573832	InternalHypervariable	0	TRA	10000	10000	0	0.26045	WRN-1b_2		Total	28	18	2	44	92	17
WRN-P	WRN-1b	Pf3D7_04	970507	InternalHypervariable	Pf3D7_12	1725941	InternalHypervariable	0	TRA	84	53	0	0.113636	WRN-1b_2
WRN-P	WRN-1b	Pf3D7_02	987	SubtelomericRepeat	Pf3D7_08	80297	Core	0	TRA	10000	10000	0	0.426923	WRN-1b_8
WRN-P	WRN-1c	Pf3D7_11	67538	SubtelomericHypervariable	Pf3D7_11	70946	SubtelomericHypervariable	3409	DEL	10000	10000	0	0.438503	WRN-1c_1
WRN-P	WRN-1c	Pf3D7_11	605404	Core	Pf3D7_11	605925	Core	548	DEL	10000	0	0	0	WRN-1c_2
WRN-P	WRN-1c	Pf3D7_11	605535	Core	Pf3D7_11	605926	Core	392	DEL	10000	0	0	0	WRN-1c_2
WRN-P	WRN-1c	Pf3D7_12	11869	SubtelomericRepeat	Pf3D7_12	13344	SubtelomericRepeat	1476	DEL	10000	99	0	0.188679	WRN-1c_3
WRN-P	WRN-1c	Pf3D7_08	1374306	SubtelomericHypervariable	Pf3D7_08	1374790	SubtelomericHypervariable	485	DEL	10000	0	0	0	WRN-1c_4
WRN-P	WRN-1c	Pf3D7_10	1665074	SubtelomericRepeat	Pf3D7_10	1669746	SubtelomericRepeat	4673	DUP	10000	10000	0	0.337143	WRN-1c_5
WRN-P	WRN-1c	Pf3D7_06	1307470	SubtelomericHypervariable	Pf3D7_11	95678	SubtelomericHypervariable	0	TRA	132	0	0.02	0	WRN-1c_6
WRN-P	WRN-1c	Pf3D7_02	874142	SubtelomericHypervariable	Pf3D7_06	1314103	SubtelomericHypervariable	0	TRA	10000	102	0.00546448	0.583333	WRN-1c_7
WRN-P	WRN-1c	Pf3D7_10	1530003	Core	Pf3D7_10	1545940	Core	15938	DEL	10000	10000	0	0	WRN-1c_8
WRN-P	WRN-1c	Pf3D7_10	1436863	Core	Pf3D7_10	1438867	Core	NA	DEL	NA	NA	NA	NA	WRN-1c_9
WRN-P	WRN-1d	Pf3D7_03	1042028	SubtelomericRepeat	Pf3D7_03	1043176	SubtelomericRepeat	1149	DEL	10000	10000	0.0143885	0.438272	WRN-1d_3
WRN-P	WRN-1d	Pf3D7_01	8993	SubtelomericRepeat	Pf3D7_07	9294	SubtelomericRepeat	0	TRA	10000	122	0	0.149153	WRN-1d_1
WRN-P	WRN-1d	Pf3D7_01	11114	SubtelomericRepeat	Pf3D7_07	10266	SubtelomericRepeat	0	TRA	10000	10000	0	0.167689	WRN-1d_1
WRN-P	WRN-1d	Pf3D7_01	14004	SubtelomericRepeat	Pf3D7_07	14473	SubtelomericRepeat	0	TRA	10000	10000	0	0.251397	WRN-1d_1
WRN-P	WRN-1d	Pf3D7_04	27629	SubtelomericHypervariable	Pf3D7_11	23204	SubtelomericHypervariable	0	TRA	126	10000	0	0.313953	WRN-1d_2
WRN-P	WRN-1e	Pf3D7_06	1307181	SubtelomericHypervariable	Pf3D7_06	1308800	SubtelomericHypervariable	1620	DEL	10000	10000	0	0.367925	WRN-1e_1
WRN-P	WRN-1e	Pf3D7_06	1308683	SubtelomericHypervariable	Pf3D7_06	1308989	SubtelomericHypervariable	307	DEL	10000	0	0.028169	0	WRN-1e_1
WRN-P	WRN-1e	Pf3D7_04	29674	SubtelomericHypervariable	Pf3D7_08	1442555	SubtelomericHypervariable	0	TRA	10000	10000	0	0.598394	WRN-1e_2
WRN-P	WRN-1e	Pf3D7_06	1417695	SubtelomericRepeat	Pf3D7_12	31560	SubtelomericHypervariable	0	TRA	91	38	0	0.142857	WRN-1e_3
WRN-P	WRN-1f	Pf3D7_07	554104	InternalHypervariable	Pf3D7_07	569080	InternalHypervariable	14977	DUP	10000	10000	0	0.565371	WRN-1f_1
WRN-P	WRN-1f	Pf3D7_06	1392143	SubtelomericRepeat	Pf3D7_06	1399860	SubtelomericRepeat	7718	DUP	10000	10000	0	0.283019	WRN-1f_2
WRN-P	WRN-1f	Pf3D7_03	27273	SubtelomericRepeat	Pf3D7_10	1665886	SubtelomericRepeat	0	TRA	10000	10000	0	0.483254	WRN-1f_3
WRN-P	WRN-1f	Pf3D7_03	29369	SubtelomericRepeat	Pf3D7_10	1665407	SubtelomericRepeat	0	TRA	10000	10000	0	0.637405	WRN-1f_3
WRN-P	WRN-1g	Pf3D7_13	49852	SubtelomericHypervariable	Pf3D7_13	2923165	SubtelomericRepeat	2873314	INV	154	10000	0	0.494253	WRN-1g_1
WRN-P	WRN-1g	Pf3D7_08	38134	SubtelomericHypervariable	Pf3D7_08	41869	SubtelomericHypervariable	3736	INV	10000	10000	0	0.633663	WRN-1g_3
WRN-P	WRN-1g	Pf3D7_14	1224	SubtelomericRepeat	Pf3D7_13	49851	SubtelomericHypervariable	0	TRA	10000	10000	0.00806452	0.247748	WRN-1g_6
WRN-P	WRN-1g	Pf3D7_08	41510	SubtelomericHypervariable	Pf3D7_05	1343062	SubtelomericRepeat	0	TRA	10000	10000	0	0.140212	WRN-1g_3
WRN-P	WRN-1g	Pf3D7_08	41510	SubtelomericHypervariable	Pf3D7_13	2924340	SubtelomericRepeat	0	TRA	10000	10000	0	0.28934	WRN-1g_3
WRN-P	WRN-1g	Pf3D7_04	51104	SubtelomericHypervariable	Pf3D7_05	1339293	SubtelomericHypervariable	0	TRA	10000	10000	0.0315789	0.674419	WRN-1g_6
WRN-P	WRN-1g	Pf3D7_04	1185731	SubtelomericRepeat	Pf3D7_06	1402126	SubtelomericRepeat	0	TRA	10000	10000	0	0.368889	WRN-1g_4
WRN-P	WRN-1g	Pf3D7_04	1186175	SubtelomericRepeat	Pf3D7_06	1387225	SubtelomericRepeat	0	TRA	10000	10000	0	0.40678	WRN-1g_4
WRN-P	WRN-1h	Pf3D7_01	11755	SubtelomericRepeat	Pf3D7_10	1675074	SubtelomericRepeat	0	TRA	10000	0	0.104167	0	WRN-1h_1
WRN-P	WRN-1h	Pf3D7_12	2251786	SubtelomericRepeat	Pf3D7_10	1675745	SubtelomericRepeat	0	TRA	10000	10000	0	0.137457	WRN-1h_2
WRN-P	WRN-1h	Pf3D7_04	29674	SubtelomericHypervariable	Pf3D7_08	1442555	SubtelomericHypervariable	0	TRA	10000	0	0	0	WRN-1h_3
WRN-P	WRN-1h	Pf3D7_04	33138	SubtelomericHypervariable	Pf3D7_10	1646679	SubtelomericHypervariable	0	TRA	10000	0	0	0	WRN-1h_4
WRN-P	WRN-1h	Pf3D7_04	1199857	SubtelomericRepeat	Pf3D7_12	31552	SubtelomericHypervariable	0	TRA	10000	0	0.109091	0	WRN-1h_5
WRN-P	WRN-1h	Pf3D7_08	446240	InternalHypervariable	Pf3D7_08	447400	InternalHypervariable	0	DUP	64	5	0.0322581	0.106383	WRN-1h_6
WRN-P	WRN-1i	Pf3D7_10	1539327	Core	Pf3D7_10	1545199	Core	5873	DEL	10000	0	0.0608696	0	WRN-1i_1
WRN-P	WRN-1i	Pf3D7_10	1539336	Core	Pf3D7_10	1542320	Core	2985	DEL	10000	10000	0.02	0.333333	WRN-1i_1
WRN-P	WRN-1i	Pf3D7_10	1542462	Core	Pf3D7_10	1545345	Core	2884	DEL	10000	51	0.0163934	0.142857	WRN-1i_1
WRN-P	WRN-1i	Pf3D7_10	1544887	Core	Pf3D7_10	1546387	Core	1501	DEL	10000	10000	0	0.18797	WRN-1i_1
WRN-P	WRN-1i	Pf3D7_09	1530126	SubtelomericRepeat	Pf3D7_09	1530660	SubtelomericRepeat	535	DEL	10000	10000	0.00526316	0.806122	WRN-1i_4
WRN-P	WRN-1i	Pf3D7_10	1543724	Core	Pf3D7_10	1544302	Core	579	DUP	10000	0	0.0543807	0	WRN-1i_1
WRN-P	WRN-1i	Pf3D7_03	14517	SubtelomericRepeat	Pf3D7_03	26227	SubtelomericRepeat	11711	DUP	10000	10000	0	0.392758	WRN-1i_2
WRN-P	WRN-1i	Pf3D7_04	1195387	SubtelomericRepeat	Pf3D7_07	5172	SubtelomericRepeat	0	TRA	10000	10000	0	0.206107	WRN-1i_3
WRN-P	WRN-1i	Pf3D7_04	1195745	SubtelomericRepeat	Pf3D7_09	1536324	SubtelomericRepeat	0	TRA	10000	10000	0	0.22093	WRN-1i_3
WRN-P	WRN-1i	Pf3D7_04	1195755	SubtelomericRepeat	Pf3D7_09	1536424	SubtelomericRepeat	0	TRA	10000	136	0	0.164948	WRN-1i_3
WRN-P	WRN-1i	Pf3D7_04	1196491	SubtelomericRepeat	Pf3D7_07	4408	SubtelomericRepeat	0	TRA	10000	10000	0	0.695187	WRN-1i_3
WRN-P	WRN-1i	Pf3D7_04	1196916	SubtelomericRepeat	Pf3D7_07	4162	SubtelomericRepeat	0	TRA	10000	0	0	0	WRN-1i_3
WRN-P	WRN-1j	Pf3D7_10	1531526	Core	Pf3D7_10	1532754	Core	1229	DEL	10000	10000	0.00884956	0.446809	WRN-1j_1
WRN-P	WRN-1j	Pf3D7_10	1436779	Core	Pf3D7_10	1438110	Core	1332	DUP	10000	10000	0.0242424	0.197531	WRN-1j_4
WRN-P	WRN-1j	Pf3D7_10	1531816	Core	Pf3D7_10	1539322	Core	7507	DUP	10000	45	0	0.3	WRN-1j_1
WRN-P	WRN-1j	Pf3D7_10	1532279	Core	Pf3D7_10	1544851	Core	12573	DUP	10000	0	0.1	0	WRN-1j_1
WRN-P	WRN-1j	Pf3D7_10	1656790	SubtelomericRepeat	Pf3D7_10	1660716	SubtelomericRepeat	3927	DUP	10000	10000	0	0.463415	WRN-1j_2
WRN-P	WRN-1j	Pf3D7_02	4779	SubtelomericRepeat	Pf3D7_09	1537500	SubtelomericRepeat	0	TRA	10000	10000	0	0.715278	WRN-1j_3
WRN-P	WRN-1k	Pf3D7_07	1440998	SubtelomericRepeat	Pf3D7_10	7178	SubtelomericRepeat	0	TRA	10000	0	0	0	WRN-1k_1
WRN-P	WRN-1k	Pf3D7_03	1057911	SubtelomericRepeat	Pf3D7_10	7180	SubtelomericRepeat	0	TRA	10000	0	0	0	WRN-1k_1
WRN-P	WRN-1k	Pf3D7_11	9355	SubtelomericRepeat	Pf3D7_10	9431	SubtelomericRepeat	0	TRA	10000	10000	0	0.283019	WRN-1k_2
WRN-P	WRN-1k	Pf3D7_09	1535395	SubtelomericRepeat	Pf3D7_03	1057920	SubtelomericRepeat	0	TRA	10000	10000	0	0.408537	WRN-1k_3
WRN-P	WRN-1k	Pf3D7_09	1535395	SubtelomericRepeat	Pf3D7_07	1440952	SubtelomericRepeat	0	TRA	10000	37	0	0.213235	WRN-1k_3
WRN-P	WRN-1k	Pf3D7_09	1535404	SubtelomericRepeat	Pf3D7_10	7053	SubtelomericRepeat	0	TRA	10000	0	0	0	WRN-1k_3
WRN-P	WRN-1k	Pf3D7_09	1535415	SubtelomericRepeat	Pf3D7_10	6435	SubtelomericRepeat	0	TRA	10000	10000	0.00813008	0.373737	WRN-1k_3
WRN-P	WRN-1k	Pf3D7_12	3415	SubtelomericRepeat	Pf3D7_03	1060029	SubtelomericRepeat	0	TRA	10000	10000	0.0166667	0.47619	WRN-1k_5
WRN-P	WRN-1k	Pf3D7_12	8579	SubtelomericRepeat	Pf3D7_10	9423	SubtelomericRepeat	0	TRA	10000	10000	0	0.485714	WRN-1k_4
WRN-P	WRN-1k	Pf3D7_12	8589	SubtelomericRepeat	Pf3D7_11	9270	SubtelomericRepeat	0	TRA	10000	10000	0	0.393548	WRN-1k_4
WRN-P	WRN-1k	Pf3D7_06	1403624	SubtelomericRepeat	Pf3D7_07	13858	SubtelomericRepeat	0	TRA	10000	10000	0	0.495726	WRN-1k_5
WRN-P	WRN-1k	Pf3D7_06	1409309	SubtelomericRepeat	Pf3D7_03	1057865	SubtelomericRepeat	0	TRA	10000	72	0	0.108434	WRN-1k_5
WRN-1a	WRN-2a	Pf3D7_08	20470	SubtelomericHypervariable	Pf3D7_03	36125	SubtelomericHypervariable	0	TRA	10000	10000	0	0.666667	WRN-2a_1
WRN-1a	WRN-2b	Pf3D7_10	1436863	Core	Pf3D7_10	1438859	Core	1997	DEL	10000	10000	0	0.287081	WRN-2b_1
WRN-1a	WRN-2b	Pf3D7_10	1523381	Core	Pf3D7_10	1534293	Core	10913	DEL	10000	0	0	0	WRN-2b_2
WRN-1a	WRN-2b	Pf3D7_10	1534293	Core	Pf3D7_10	1545095	Core	10803	DUP	10000	10000	0	0.328704	WRN-2b_2
WRN-1a	WRN-2b	Pf3D7_10	1657966	SubtelomericRepeat	Pf3D7_10	1665305	SubtelomericRepeat	7340	DUP	10000	10000	0.010989	0.286364	WRN-2b_3
WRN-1a	WRN-2b	Pf3D7_13	1430377	Core	Pf3D7_13	1449325	Core	18949	INV	10000	57	0	0.118644	WRN-2b_4
WRN-1a	WRN-2c	Pf3D7_10	1436886	Core	Pf3D7_10	1438177	Core	1292	DEL	10000	10000	0.0604982	0.116766	WRN-2c_1
WRN-1a	WRN-2c	Pf3D7_10	1530136	Core	Pf3D7_10	1543910	Core	13775	DEL	10000	0	0	0	WRN-2c_1
WRN-1a	WRN-2c	Pf3D7_07	532237	InternalHypervariable	Pf3D7_07	571481	InternalHypervariable	39245	DEL	10000	10000	0	0.438871	WRN-2c_2
WRN-1a	WRN-2c	Pf3D7_02	257	SubtelomericRepeat	Pf3D7_02	22386	SubtelomericRepeat	22130	DEL	10000	0	0	0	WRN-2c_3
WRN-1a	WRN-2c	Pf3D7_10	1657274	SubtelomericRepeat	Pf3D7_10	1669247	SubtelomericRepeat	11974	DUP	10000	41	0	0.111111	WRN-2c_4
WRN-1a	WRN-2c	Pf3D7_10	1657997	SubtelomericRepeat	Pf3D7_10	1670369	SubtelomericRepeat	12373	DUP	10000	66	0	0.107527	WRN-2c_4
WRN-1a	WRN-2c	Pf3D7_07	531520	InternalHypervariable	Pf3D7_07	570792	InternalHypervariable	39273	DUP	10000	10000	0	0.514286	WRN-2c_5
WRN-1a	WRN-2c	Pf3D7_07	532586	InternalHypervariable	Pf3D7_07	571723	InternalHypervariable	39138	DUP	10000	10000	0	0.454023	WRN-2c_2
WRN-1a	WRN-2c	Pf3D7_11	11213	SubtelomericRepeat	Pf3D7_13	2912188	SubtelomericRepeat	0	TRA	10000	10000	0	0.365269	WRN-2c_7
WRN-1a	WRN-2c	Pf3D7_08	41675	SubtelomericHypervariable	Pf3D7_13	301	SubtelomericRepeat	0	TRA	10000	10000	0	0.535135	WRN-2c_8
WRN-1a	WRN-2c	Pf3D7_08	41677	SubtelomericHypervariable	Pf3D7_11	2037146	SubtelomericRepeat	0	TRA	10000	10000	0	0.418327	WRN-2c_8
WRN-1a	WRN-2c	Pf3D7_02	22387	SubtelomericRepeat	Pf3D7_13	2924500	SubtelomericRepeat	0	TRA	10000	66	0	0.816	WRN-2c_9
WRN-1a	WRN-2d	Pf3D7_10	1538235	Core	Pf3D7_10	1545982	Core	7748	DEL	10000	0	0	0	WRN-2d_1
WRN-1a	WRN-2d	Pf3D7_11	96862	SubtelomericHypervariable	Pf3D7_11	98138	SubtelomericHypervariable	1277	DEL	10000	0	0.0145985	0	WRN-2d_3
WRN-1a	WRN-2d	Pf3D7_11	96945	SubtelomericHypervariable	Pf3D7_11	99507	SubtelomericHypervariable	2563	DEL	126	10000	0.0175439	0.322034	WRN-2d_3
WRN-1a	WRN-2d	Pf3D7_10	1657966	SubtelomericRepeat	Pf3D7_10	1665305	SubtelomericRepeat	7340	DUP	10000	10000	0.010989	0.296451	WRN-2d_2
WRN-1a	WRN-2e	Pf3D7_10	38765	SubtelomericHypervariable	Pf3D7_10	45532	SubtelomericHypervariable	6768	DEL	10000	0	0	0	WRN-2e_1
WRN-1a	WRN-2e	Pf3D7_10	1536300	Core	Pf3D7_10	1540815	Core	4516	DEL	10000	10000	0.00378788	0.810127	WRN-2e_2
WRN-1a	WRN-2e	Pf3D7_10	1539330	Core	Pf3D7_10	1544627	Core	5298	DEL	10000	67	0.00373134	0.3	WRN-2e_2
WRN-1a	WRN-2e	Pf3D7_10	1539332	Core	Pf3D7_10	1541415	Core	2084	DEL	10000	30	0.00757576	0.222222	WRN-2e_2
WRN-1a	WRN-2e	Pf3D7_10	1539337	Core	Pf3D7_10	1542321	Core	2985	DEL	10000	42	0.0222222	0.333333	WRN-2e_2
WRN-1a	WRN-2e	Pf3D7_09	1509123	SubtelomericRepeat	Pf3D7_09	1518153	SubtelomericRepeat	9031	DEL	10000	0	0	0	WRN-2e_3
WRN-1a	WRN-2e	Pf3D7_06	1305951	SubtelomericHypervariable	Pf3D7_06	1307678	SubtelomericHypervariable	1728	DEL	10000	72	0	0.132867	WRN-2e_6
WRN-1a	WRN-2e	Pf3D7_06	1306011	SubtelomericHypervariable	Pf3D7_06	1308717	SubtelomericHypervariable	2707	DEL	10000	58	0	0.105882	WRN-2e_6
WRN-1a	WRN-2e	Pf3D7_10	1539209	Core	Pf3D7_10	1544824	Core	5616	DUP	10000	10000	0.0503876	0.285714	WRN-2e_2
WRN-1a	WRN-2e	Pf3D7_08	23645	SubtelomericHypervariable	Pf3D7_08	36477	SubtelomericHypervariable	12833	DUP	10000	10000	0	0.501706	WRN-2e_4
WRN-1a	WRN-2e	Pf3D7_12	2254567	SubtelomericRepeat	Pf3D7_10	1670262	SubtelomericRepeat	0	TRA	10000	10000	0	0.15677	WRN-2e_5
WRN-1a	WRN-2e	Pf3D7_02	19890	SubtelomericRepeat	Pf3D7_09	1518153	SubtelomericRepeat	0	TRA	10000	10000	0	0.392523	WRN-2e_3
WRN-1a	WRN-2f	Pf3D7_10	1436892	Core	Pf3D7_10	1437970	Core	1079	DEL	10000	10000	0.0609319	0.245098	WRN-2f_1
WRN-1a	WRN-2f	Pf3D7_13	2909681	SubtelomericRepeat	Pf3D7_13	2910516	SubtelomericRepeat	836	DEL	10000	10000	0	0.595855	WRN-2f_2
WRN-1a	WRN-2f	Pf3D7_09	1511143	SubtelomericRepeat	Pf3D7_09	1513921	SubtelomericRepeat	2779	DEL	10000	10000	0	0.178125	WRN-2f_3
WRN-1a	WRN-2f	Pf3D7_06	1306831	SubtelomericHypervariable	Pf3D7_06	1308493	SubtelomericHypervariable	1663	DEL	10000	117	0	0.15	WRN-2f_4
WRN-1a	WRN-2f	Pf3D7_10	1436798	Core	Pf3D7_10	1437256	Core	459	DUP	10000	0	0.105121	0	WRN-2f_1
WRN-1a	WRN-2f	Pf3D7_09	1509565	SubtelomericRepeat	Pf3D7_09	1523050	SubtelomericRepeat	13486	DUP	10000	10000	0	0.466165	WRN-2f_3
WRN-1a	WRN-2f	Pf3D7_09	1531375	SubtelomericRepeat	Pf3D7_13	2909773	SubtelomericRepeat	0	TRA	10000	10000	0	0.484305	WRN-2f_2
WRN-1a	WRN-2f	Pf3D7_01	14102	SubtelomericRepeat	Pf3D7_09	1513938	SubtelomericRepeat	0	TRA	10000	10000	0	0.34188	WRN-2f_3
WRN-1a	WRN-2f	Pf3D7_08	1458326	SubtelomericRepeat	Pf3D7_09	1513928	SubtelomericRepeat	0	TRA	10000	10000	0	0.352201	WRN-2f_3
WRN-1a	WRN-2f	Pf3D7_02	30767	SubtelomericHypervariable	Pf3D7_11	31258	SubtelomericHypervariable	0	TRA	10000	10000	0	0.43871	WRN-2f_5
WRN-1a	WRN-2f	Pf3D7_02	918478	SubtelomericHypervariable	Pf3D7_12	21817	SubtelomericHypervariable	0	TRA	10000	0	0	0	WRN-2f_4
WRN-1a	WRN-2f	Pf3D7_02	918579	SubtelomericHypervariable	Pf3D7_12	21753	SubtelomericHypervariable	0	TRA	10000	10000	0	0.825243	WRN-2f_4
WRN-1a	WRN-2g	Pf3D7_12	1705426	InternalHypervariable	Pf3D7_12	1720492	InternalHypervariable	15067	DEL	7	0	0	0	WRN-2g_1
WRN-1a	WRN-2g	Pf3D7_12	1706099	InternalHypervariable	Pf3D7_12	1721237	InternalHypervariable	15139	DEL	10000	10000	0	0.596639	WRN-2g_1
WRN-1a	WRN-2g	Pf3D7_12	1706005	InternalHypervariable	Pf3D7_12	1721141	InternalHypervariable	15137	DUP	10000	10000	0	0.690058	WRN-2g_1
WRN-1a	WRN-2g	Pf3D7_13	27624	SubtelomericHypervariable	Pf3D7_10	1643575	SubtelomericHypervariable	0	TRA	10000	10000	0	0.15873	WRN-2g_2
WRN-1a	WRN-2g	Pf3D7_13	2915570	SubtelomericRepeat	Pf3D7_03	1057912	SubtelomericRepeat	0	TRA	10000	10000	0	0.447619	WRN-2g_3
WRN-1a	WRN-2g	Pf3D7_12	9758	SubtelomericRepeat	Pf3D7_07	9620	SubtelomericRepeat	0	TRA	10000	10000	0.00404858	0.370474	WRN-2g_4
WRN-1a	WRN-2g	Pf3D7_12	1711577	InternalHypervariable	Pf3D7_11	30807	SubtelomericHypervariable	0	TRA	10000	10000	0	0.507246	WRN-2g_5
WRN-1a	WRN-2g	Pf3D7_12	1712110	InternalHypervariable	Pf3D7_11	31275	SubtelomericHypervariable	0	TRA	10000	10000	0	0.143312	WRN-2g_5
WRN-1a	WRN-2g	Pf3D7_06	1378983	SubtelomericHypervariable	Pf3D7_11	27880	SubtelomericHypervariable	0	TRA	10000	10000	0.00595238	0.544747	WRN-2g_6
WRN-1a	WRN-2g	Pf3D7_06	1379457	SubtelomericHypervariable	Pf3D7_11	27422	SubtelomericHypervariable	0	TRA	10000	10000	0	0.5	WRN-2g_6
WRN-1a	WRN-2g	Pf3D7_06	1379701	SubtelomericHypervariable	Pf3D7_11	27089	SubtelomericHypervariable	0	TRA	10000	10000	0	0.376263	WRN-2g_6
WRN-1a	WRN-2h	Pf3D7_06	1403089	SubtelomericRepeat	Pf3D7_06	1403742	SubtelomericRepeat	654	DEL	10000	10000	0	0.34657	WRN-2h_1
WRN-1a	WRN-2h	Pf3D7_13	35701	SubtelomericHypervariable	Pf3D7_13	53200	SubtelomericHypervariable	17500	DUP	10	103	0	0.266667	WRN-2h_2
WRN-1a	WRN-2h	Pf3D7_06	1402902	SubtelomericRepeat	Pf3D7_06	1403552	SubtelomericRepeat	651	DUP	10000	10000	0	0.365772	WRN-2h_1
WRN-1a	WRN-2h	Pf3D7_04	550370	InternalHypervariable	Pf3D7_04	565790	InternalHypervariable	15421	DUP	10000	10000	0	0.420139	WRN-2h_4
WRN-1a	WRN-2h	Pf3D7_06	1403172	SubtelomericRepeat	Pf3D7_12	11703	SubtelomericRepeat	0	TRA	10000	10000	0	0.550296	WRN-2h_1

## Sheet: SV_within_var_genes
Type	Parent	ProgID	Progeny	Chrom1	SVstart	Var1	Var1_OldID	VarUps1	VarLoc1	VarDelCoord1	VarIB_start1	VarIB_end1	Domain1	Chrom2	SVend	Var2	Var2_OldID	VarUps2	VarLoc2	VarDelCoord2	VarIB_start2	VarIB_end2	Domain2	IB_length	IB_Seq	Note
Exon 1	3D7-P	PG0479-C	3D7-1a	Pf3D7_06		PF3D7_0600200	MAL6P1.316	B2	ST	515	550	566	DBLa2	Pf3D7_08		PF3D7_0800100	PF08_0142	B1	T	609	576	592	DBLa0.9	17	gtacgcggcaaagatct
Exon 1	3D7-P	PG0481-C	3D7-1c	Pf3D7_01		PF3D7_0100100	PFA0005w	B1	T		4864	4874	INTERDOM	Pf3D7_12		PF3D7_1200100	PFL0005w	B1	T		4744	4754	INTERDOM	11	gatgacgatga
Exon 1	3D7-P	PG0481-C	3D7-1c	Pf3D7_01		PF3D7_0100100	PFA0005w	B1	T	4937	4951	4962	INTERDOM	Pf3D7_12		PF3D7_1200100	PFL0005w	B1	T	4867	4843	4854	INTERDOM	12	GAAGACGGTTGT
Exon 1	3D7-P	PG0481-C	3D7-1c	Pf3D7_01		PF3D7_0100100	PFA0005w	B1	T	5270	5191	5229	INTERDOM	Pf3D7_12		PF3D7_1200100	PFL0005w	B1	T	5009	5014	5052	INTERDOM	39	TCTTCTACCATCATGTGGAGTATTGGCATCGGTTTTGCT
Exon 2	3D7-P	PG0481-C	3D7-1c	Pf3D7_01		PF3D7_1000100	PF10_0001	B1	T	7239	7166	7211	ATSB1	Pf3D7_04		PF3D7_0426000	PFD1245c	B1	T	6743	6608	6653	ATSB8	46	GGGACAAATCATGTGAAACAAACAAGTATACATAGTGTTGCCAAAC
Exon 2	3D7-P	PG0481-C	3D7-1c	Pf3D7_01		PF3D7_1000100	PF10_0001	B1	T	7213	7250	7256	ATSB1	Pf3D7_04		PF3D7_0426000	PFD1245c	B1	T	6577	6692	6698	ATSB8	7	TTCCATA
Exon 2	3D7-P	PG0481-C	3D7-1c	Pf3D7_01		PF3D7_1000100	PF10_0001	B1	T	7213	7250	7256	ATSB1	Pf3D7_13		PF3D7_1373500	PF13_0364	B1	T
Exon 1	3D7-P	PG0483-C	3D7-1e	Pf3D7_04		PF3D7_0400100	PFD0005w	B1	T	4466	4426	4460	DBLd1	Pf3D7_13		PF3D7_1300100	PF13_0001	B1	T	3089	3100	3134	DBLd1	35	CAGATGTTTTATACATTAGGTGATTATAGAGATAT
Exon 1	3D7-P	PG0483-C	3D7-1e	Pf3D7_04		PF3D7_0400100	PFD0005w	B1	T	4940	4957	4979	DBLd1	Pf3D7_13		PF3D7_1300100	PF13_0001	B1	T	3594	3550	3572	DBLd1	23	TTCCGATACCTTGAAGAATGGGG
Exon 1	3D7-1d	PG0514-C	3D7-2a	Pf3D7_09	21026	PF3D7_0900100	PFI0005w	B1	T	946	948	971	DBLa0.16	Pf3D7_09	1502374	PF3D7_0937800	PFI1830c	B1	T	962	933	956	DBLa0.1	24	TCTTCGCTGGTTCGAGGAATGGGC
Exon 1_Tel	3D7-1d	PG0514-C	3D7-2a	Pf3D7_01	611359	PF3D7_0115700	PFA0765c	B1	T	3534	NA	NA	DBLd1	Pf3D7_03	1063368	NA	NA	NA	NA	962	NA	NA	NA	NA
Exon 1	3D7-1d	PG0517-C	3D7-2d	Pf3D7_07	559100	PF3D7_0712400	NA	NA	NA	3534	NA	NA		Pf3D7_07	574322	PF3D7_0712600	NA	NA	C	962	NA	NA	NA	NA
Exon 1	3D7-2c	PG0554-C	3D7-3b	PF3D7_04		PF3D7_0400100	PFD0005w	B1	T	3750	3778	3786	DBLd1	Pf3D7_08		PF3D7_0800100	PF08_0142	B1	T	2466	2473	2481	DBLd1	9	ACACTATTT
Exon 1	3D7-2c	PG0554-C	3D7-3b	Pf3D7_04	33661	PF3D7_0400100	PFD0005w	B1	T	4955	4981	4992	DBLd1	Pf3D7_08	24769	PF3D7_0800100	PF08_0142	B1	T	3408	3433	3444	DBLd1	12	GAAACATTTTGT
Exon 2	3D7-2c	PG0554-C	3D7-3b	Pf3D7_04	37264	PF3D7_0400100	PFD0005w	B1	T	8558			Exon2	Pf3D7_08	28215	PF3D7_0800100	PF08_0142	B1	T	6854			Exon2
Exon 1	3D7-2c	PG0558-C	3D7-3f	Pf3D7_04	35242	PF3D7_0400100	PFD0005w	B1	T	6536	6538	6551	ATSB1??	Pf3D7_13	35934	PF3D7_1300300	PF13_0003	A1	ST	8808	8809	8822	ATSA2??	14	ATCGGTTTTGCGGC	The recombination breakpoint is just 25bp before the 3' end of exon 1, and not
Exon 1	3D7-3g	PG0594-C	3D7-4g	Pf3D7_04	32671	PF3D7_0400100	PFD0005w	B1	T	3965	NA	NA	DBLd1	Pf3D7_08	24007	PF3D7_0800100	PF08_0142	B1	T	2646			DBLd1	NA
Exon 1_AllBLM	BLM-P	All_BLM_prog	All_BLM_prog	PF3D7_01		PF3D7_0100100	PFA0005w	B1	T	2703	2709	2738	DBLd1	Pf3D7_05		PF3D7_0500100	PFE0005w	B1	T	2780	2712	2741	DBLd1	30	CACCACCGGTGGTAGTATTTGTGTGCCACC
Exon 1_AllBLM	BLM-P	All_BLM_prog	All_BLM_prog	PF3D7_01		PF3D7_0100100	PFA0005w	B1	T	3366	3308	3335	DBLd1	Pf3D7_08		PF3D7_0833500	MAL7P1.212	B1	T	3556	3563	3590	DBLd1	28	CCTGGTGGAATGCACACGCCCCTTCCAT
Exon 1_AllBLM	BLM-P	All_BLM_prog	All_BLM_prog	PF3D7_01		PF3D7_0100100	PFA0005w	B1	T	5139	5146	5152	INTERDOM	Pf3D7_08		PF3D7_0833500	MAL7P1.212	B1	T	5369	5338	5344	INTERDOM	7	CCCCCAA
Exon 1	BLM-3j	PG0598-C	BLM-4d	Pf3D7_07	572372	PF3D7_0712600	PF07_0051	C1	C	1936	1916	1937	CIDRa3.1	Pf3D7_07	595796	PF3D7_0712900	MAL7P1.56	C2	C	1937	1916	1937	CIDRa3.1	22	ATGCAGGCGGATTATGTATATT
Exon 1	BLM-3j	PG0605-C	BLM-4k	Pf3D7_01	612314	PF3D7_0115700	PFA0765c	B1	T	2579	2564	2579	NA	Pf3D7_13	2889681	PF3D7_1373500	PF13_0364	B1	T	2659	2645	2660	NA	16	AGTCGGAGGAAAAGGA
Exon 1	BLM-3j	PG0605-C	BLM-4k	Pf3D7_12	19708	PF3D7_1200100	PFL0005w	B1	T	2735	2743	2771	DBLd1	Pf3D7_01	611899	PF3D7_0115700	PFA0765c	B1	T	2994	2974	3002	DBLd1	29	GACGACAAGTCATTACGTAAGTGGTTTAT
Exon 1	BLM-3j	PG0605-C	BLM-4k	Pf3D7_12	19972	PF3D7_1200100	PFL0005w	B1	T	2999	2983	2991	DBLd1	Pf3D7_01	611735	PF3D7_0115700	PFA0765c	B1	T	3158	3214	3222	DBLd1	9	GATATATTA
Exon 1	WRN-P	PG0543-C	WRN-1b	Pf3D7_04	964812	PF3D7_0421100	PFD1005c	B5	C	799	776	799	DBLa0.8	Pf3D7_04	975805	PF3D7_0421300	PFD1015c	C1	C	786	764	787	DBLa0.24	24	AAGTATGGAAAGCTATCACGTGCG
Exon 1	WRN-P	PG0543-C	WRN-1b	Pf3D7_04	965154	PF3D7_0421100	PFD1005c	B5	C	457	448	458	DBLa0.8	Pf3D7_07	573832	PF3D7_0712600	PF07_0051	C1	C	476	472	482	DBLa0.24	11	GTGTGTCTTGC
intron	WRN-P	PG0543-C	WRN-1b	Pf3D7_04	970507	PF3D7_0421300	PFD1015c	C1	C	6084	NA	NA	NA	Pf3D7_12	1725941	PF3D7_1240600	PFL1960w	C1	C	6367	NA	NA	NA	NA
Exon 1	WRN-P	PG0546-C, PG0549-C	WRN-1e,WRN-1h	Pf3D7_04	29674	PF3D7_0400100	PFD0005w	B1	T	968	970	983	DBLa0.5	Pf3D7_08	1442555	PF3D7_0833500	MAL7P1.212	B1	T	894	895	908	DBLa0.17	14	GTCCCCACATATTT
Exon 1	WRN-P	PG0546-C, PG0549-C, PG0552-C	WRN-1e,WRN-1h,WRN-1k	PF3D7_08		PF3D7_0808600	PF08_0107	C1	C	124	130	147	NTSB3	Pf3D7_08		PF3D7_0808700	PF08_0106	B7	C	357	118	135	NTSB3	18	TTGACAGGACAGTTGTCA
Exon 1	WRN-P	PG0547-C	WRN-1f	Pf3D7_07	554104	PF3D7_0712400	PF07_0050	B3	C	4974	4885	4904	INTERDOM	Pf3D7_07	569080	PF3D7_0712600	PF07_0051	C1	C	5228	5233	5252	INTERDOM	20	TCTTCTACCATCATGTGGAG
Exon 1	WRN-P	PG0548-C	WRN-1g	Pf3D7_08	38134	PF3D7_0800200	PF08_0141	A3	ST	899	901	909	DBLa1.6	Pf3D7_08	41869	PF3D7_0800300	PF08_0140	B2	SST	921	922	930	DBLa2	9	CCTCAATTT
Exon 1_Tel	WRN-P	PG0548-C	WRN-1g	Pf3D7_08	41510	PF3D7_0800300	PF08_0140	B2	SST	562	NA	NA	DBLa2	Pf3D7_05	1343062	NA	NA	NA	NA	921	NA	NA	NA	NA
Exon 1	WRN-P	PG0548-C	WRN-1g	Pf3D7_04	51104	PF3D7_0400400	PFD0020c	A1	ST	5756	5758	5771	DBLg11	Pf3D7_05	1339293	PF3D7_0533100	PFE1640w	A2	T	5823	5824	5837	DBLe1	14	GATACACCTAGTGA
Exon 1	WRN-P	PG0549-C	WRN-1h	Pf3D7_04	33138	PF3D7_0400100	PFD0005w	B1	T	4433	4447	4527	DBLd1	Pf3D7_10	1646679	PF3D7_1041300	PF10_0406	B1	T	3271	3184	3264	DBLd1	81	GATTATAGAGATATTTTGGTACGAGGTGGTAACACAAGTGACAGTGGTAACACAAATGGTAGTAACAACAACAATATTGTG
Exon 1	WRN-P	PG0549-C	WRN-1h	Pf3D7_04	29674	PF3D7_0400100	PFD0005w	B1	T	968	970	983	DBLa0.5	Pf3D7_08	1442555	PF3D7_0833500	MAL7P1.212	B1	T	894	895	908	DBLa0.17	14	GTCCCCACATATTT
Exon 1	WRN-P	PG0549-C	WRN-1h	Pf3D7_08	446240	PF3D7_0808700	PF08_0106	B7	C	5832	NA	NA	NA	Pf3D7_08	467400	PF3D7_0809100	PF08_0106	B7	C	6992	NA	NA	NA	NA
Exon 1	WRN-1a	PG0582-C	WRN-2c	Pf3D7_07	532237	PF3D7_0712000	PF07_0049	C1	C	2894	3603	3612	DBLd1	Pf3D7_07	571481	PF3D7_0712600	PF07_0051	C1	C	2827	3507	3516	DBLd1	10	TTTCGGGAAA
Exon 1	WRN-1a	PG0582-C	WRN-2c	Pf3D7_07	532586	PF3D7_0712000	PF07_0049	C1	C	2545	2884	2894	DBLd1	Pf3D7_07	571723	PF3D7_0712600	PF07_0051	C1	C	2585	2818	2828	DBLd1	11	TGTGTGCCACC
Exon 1	WRN-1a	PG0582-C	WRN-2c	Pf3D7_07	532586	PF3D7_0712000	PF07_0049	C1	C	2545	2536	2543	INTERDOM	Pf3D7_07	571723	PF3D7_0712600	PF07_0051	C1	C	2585	1876	1883	INTERDOM	8	GAAGAAGA
Exon 1	WRN-1a	PG0582-C	WRN-2c	Pf3D7_08	41675	PF3D7_0800300	PF08_0140	B2	SST	727	727	727	DBLa2	Pf3D7_13	301	NA	NA	NA	NA	2585	NA	NA	NA	NA
Exon 1	WRN-1a	PG0584-C	WRN-2e	Pf3D7_08	23645	PF3D7_0800100	PF08_0142	B1	T	2284	2285	2298	INTERDOM	Pf3D7_08	36477	PF3D7_0800200	PF08_0141	A3	ST	2556	2501	2514	DBLb6	14	ACGACGAAGACGAC
Exon 2	WRN-1a	PG0585-C	WRN-2f	Pf3D7_02	30767	PF3D7_0200100	PFB0010w	B1	T	5535			NA	Pf3D7_11	31258	PF3D7_1100100	PF11_0007	B1	T	7098			NA
Exon 1	WRN-1a	PG0585-C	WRN-2f	Pf3D7_02	918478	PF3D7_0223500	PFB1055c	B1	T	5170	5044	5069	INTERDOM	Pf3D7_12	21817	PF3D7_1200100	PFL0005w	B1	T	4844	4756	4781	INTERDOM	26	GAACCCCTTGAAGAAACAGAAGAAAA
Exon 1	WRN-1a	PG0585-C	WRN-2f	Pf3D7_02	918579	PF3D7_0223500	PFB1055c	B1	T	5069	5151	5165	INTERDOM	Pf3D7_12	21753	PF3D7_1200100	PFL0005w	B1	T	4780	4860	4874	INTERDOM	15	GGCATCACCAGCACC
Exon 1	WRN-1a	PG0586-C	WRN-2g	Pf3D7_12	1705426	PF3D7_1240400	PFL1955w	B7	C	914	970	986	DBLa0.16	Pf3D7_12	1720492	PF3D7_1240600	PFL1960w	C1	C	918	973	989	DBLa0.20	17	TTTTGTAGGAAAAAAAA
Exon 1	WRN-1a	PG0586-C	WRN-2g	Pf3D7_12	1706099	PF3D7_1240400	PFL1955w	B7	C	1587	1494	1513	CIDRa3.4	Pf3D7_12	1721237	PF3D7_1240600	PFL1960w	C1	C	1663	1569	1588	CIDRa3.1	20	TTGTGGAATGAAAAAGAAAG
Exon 1	WRN-1a	PG0586-C	WRN-2g	Pf3D7_12	1706005	PF3D7_1240400	PFL1955w	B7	C	1493	1589	1619	CIDRa3.4	Pf3D7_12	1721141	PF3D7_1240600	PFL1960w	C1	C	1567	1664	1694	CIDRa3.1	31	CTACTGAAATTAAAATCCTTAAAGTGGTGA
Exon 2	WRN-1a	PG0586-C	WRN-2g	Pf3D7_13	27624	PF3D7_1300100	PF13_0001	B1	T	6260	NA	NA	NA	Pf3D7_10	1643575	PF3D7_1041300	PF10_0406	B1	T	6373	NA	NA	NA	NA
Exon 2	WRN-1a	PG0586-C	WRN-2g	Pf3D7_12	1711577	PF3D7_1240400	PFL1955w	B7	C	7065	NA	NA	NA	Pf3D7_11	30807	PF3D7_1100100	PF11_0007	B1	T	6647	NA	NA	NA	NA
Exon 2	WRN-1a	PG0586-C	WRN-2g	Pf3D7_12	1712110	PF3D7_1240400	PFL1955w	B7	C	7598	NA	NA	NA	Pf3D7_11	31275	PF3D7_1100100	PF11_0007	B1	T	7115	NA	NA	NA	NA
Exon 1	WRN-1a	PG0586-C	WRN-2g	Pf3D7_06	1378983	PF3D7_0632800	MAL6P1.1	B1	T	3644	2900	2907	DBLd1	Pf3D7_11	27880	PF3D7_1100100	PF11_0007	B1	T	3720	2945	2952	DBLd1	8	CTTCGGCG
Exon 1	WRN-1a	PG0586-C	WRN-2g	Pf3D7_06	1379457	PF3D7_0632800	MAL6P1.1	B1	T	3170	3157	3170	DBLd1	Pf3D7_11	27422	PF3D7_1100100	PF11_0007	B1	T	3262	3250	3263	DBLd1	14	CAGATGTTTTATAC
Exon 1	WRN-1a	PG0586-C	WRN-2g	Pf3D7_06	1379701	PF3D7_0632800	MAL6P1.1	B1	T	2926	3646	3659	DBLd1	Pf3D7_11	27089	PF3D7_1100100	PF11_0007	B1	T	2929	3721	3734	DBLd1	14	CCCCCCTACTTCCG
Exon 1	WRN-1a	PG0587-C	WRN-2h	Pf3D7_04	550370	PF3D7_0412400	PFD0615c	C1	C	3440	3211	3227	DBLd1	Pf3D7_04	565790	PF3D7_0412700	PFD0625c	C1	C	3552	3256	3272	DBLd1	17	CAGATGTTTTATACTTT
RIFIN	3D7-2c	PG0553-C	3D7-3a	Pf3D7_09	50470	NA	NA	NA	NA	3534	NA	NA	NA	Pf3D7_09	62123	NA	NA	NA	NA	962	NA	NA	NA	NA
RIFIN	WRN-1a	PG0584-C	WRN-2e	Pf3D7_10	38765	PF3D7_1000200	NA	NA	NA	NA	NA	NA	NA	Pf3D7_10	45532	PF3D7_1000400	NA	NA	NA	2585	NA	NA	NA	NA

## Sheet: MutationRate
										BPS Mutation Rate							Micro-indel Mutation Rate							Structural Variant Mutation Rate
3D7 Clone Tree (wild-type)
Generation	Number of clones	Culturing (days)	Culturing (hrs)	Life cycle time (hrs)	Number of life cycles	Weighting	Weighting Culturing days	Weighting Average		Number of BPS	BPS / clone	BPS / life cycle	BPS / life cycle / nucleotide	Weighted BPS / life cycle / nucleotide	SEM		Number of indel	indel / clone	indel / life cycle	indel / life cycle / nucleotide	Weighted indel / life cycle / nucleotide	SEM		Number of SV	SV / clone	SV / life cycle	SV / life cycle / nucleotide	Weighted SV / life cycle / nucleotide	SEM
3D7gen1	6	Unknown				21	196			5	0.833333						13	2.16667
3D7gen2	5	68	1632	44.1	37.0068	0.238095	0.346939	0.292517		0	0	0	0	0			3	0.6	0.0162132	6.95847e-10	2.03547e-10			4	0.8	0.0216176	9.27796e-10	2.71396e-10
3D7gen3	9	44	1056	44.1	23.9456	0.428571	0.22449	0.326531		1	0.111111	0.00464015	1.99148e-10	6.5028e-11			9	1	0.0417614	1.79233e-09	5.85252e-10			8	0.888889	0.0371212	1.59319e-09	5.20224e-10
3D7gen4	7	84	2016	44.1	45.7143	0.333333	0.428571	0.380952		4	0.571429	0.0125	5.36481e-10	2.04374e-10			18	2.57143	0.05625	2.41416e-09	9.19681e-10			1	0.142857	0.003125	1.3412e-10	5.10934e-11
Total	27	196								10			BPS mutation rate =	2.69402e-10	1.56572e-10		43			Indel mutation rate =	1.70848e-09	5.02304e-10		13			SV mutation rate =	8.42713e-10	4.21738e-10
ΔPfBLM Clone Tree
Generation	Number of clones	Culturing (days)	Culturing (hrs)	Life cycle time (hrs)	Number of life cycles	Weighting	Weighting Culturing days	Weighting Average		Number of BPS	BPS / clone	BPS / life cycle	BPS / life cycle / nucleotide	Weighted BPS / life cycle / nucleotide	SEM		Number of indel	indel / clone	indel / life cycle	indel / life cycle / nucleotide	Weighted indel / life cycle / nucleotide	SEM		Number of SV	SV / clone	SV / life cycle	SV / life cycle / nucleotide	Weighted SV / life cycle / nucleotide	SEM
BLMgen1	5	Unknown				30	186			2	0.4						3	0.6
BLMgen2	6	62	1488	44.1	33.7415	0.2	0.333333	0.266667		1	0.166667	0.00493952	2.11996e-10	5.65324e-11			2	0.333333	0.00987903	4.23993e-10	1.13065e-10			3	0.5	0.0148185	6.35989e-10	1.69597e-10
BLMgen3	12	40	960	44.1	21.7687	0.4	0.215054	0.307527		3	0.25	0.0114844	4.92892e-10	1.51577e-10			10	0.833333	0.0382813	1.64297e-09	5.05258e-10			8	0.666667	0.030625	1.31438e-09	4.04206e-10
BLMgen4	12	84	2016	44.1	45.7143	0.4	0.451613	0.425806		4	0.333333	0.00729167	3.12947e-10	1.33255e-10			17	1.41667	0.0309896	1.33003e-09	5.66333e-10			17	1.41667	0.0309896	1.33003e-09	5.66333e-10
Total	35	186								10			BPS mutation rate =	3.41365e-10	8.21493e-11		32			Indel mutation rate =	1.18466e-09	3.65509e-10		28			SV mutation rate =	1.14014e-09	2.28782e-10
WRN-k/d Clone Tree
Generation	Number of clones	Culturing (days)	Culturing (hrs)	Life cycle time (hrs)	Number of life cycles	Weighting	Weighting Culturing days	Weighting Average		Number of BPS	BPS / clone	BPS / life cycle	BPS / life cycle / nucleotide	Weighted BPS / life cycle / nucleotide	SEM		Number of indel	indel / clone	indel / life cycle	indel / life cycle / nucleotide	Weighted indel / life cycle / nucleotide	SEM		Number of BPS	BPS / clone	BPS / life cycle	BPS / life cycle / nucleotide	Weighted BPS / life cycle / nucleotide	SEM
WRNgen0	1	Unknown				19	244
WRNgen1	11	77	1848	44.1	41.9048	0.578947	0.315574	0.447261		8	0.727273	0.0173554	7.44866e-10	3.33149e-10			56	5.09091	0.121488	5.21406e-09	2.33204e-09			55	5	0.119318	5.12095e-09	2.2904e-09
WRNgen2	8	167	4008	44.1	90.8844	0.421053	0.684426	0.552739		5	0.625	0.00687687	2.95145e-10	1.63138e-10			40	5	0.055015	2.36116e-09	1.3051e-09			37	4.625	0.0508888	2.18407e-09	1.20722e-09
Total	19	244											BPS mutation rate =	4.96287e-10	2.24861e-10		96			Indel mutation rate =	3.63715e-09	1.42645e-09		92			SV mutation rate =	3.49762e-09	1.46844e-09
