# Supplementary material for: RecQ helicases in the malaria parasite Plasmodium falciparum affect genome stability, gene expression patterns and DNA replication dynamics
Source: PLOS journal article supplement (doi:10.1371/journal.pgen.1007490), 2018-07-02

Figure S4

A

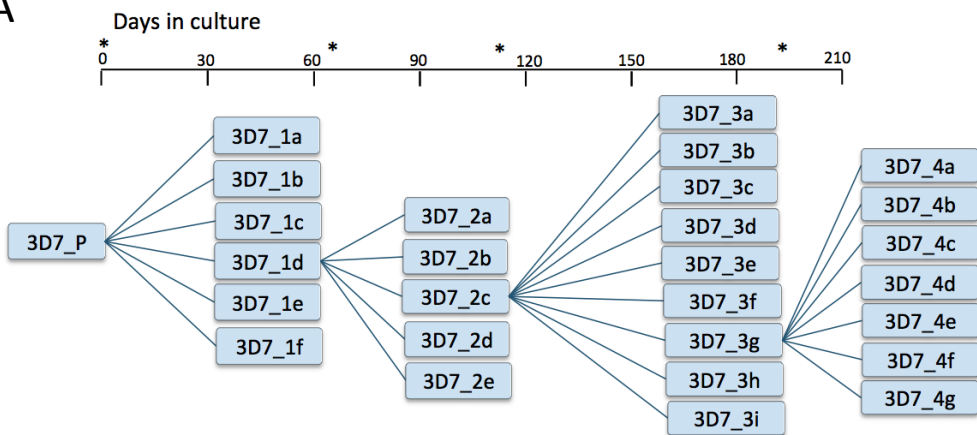

B

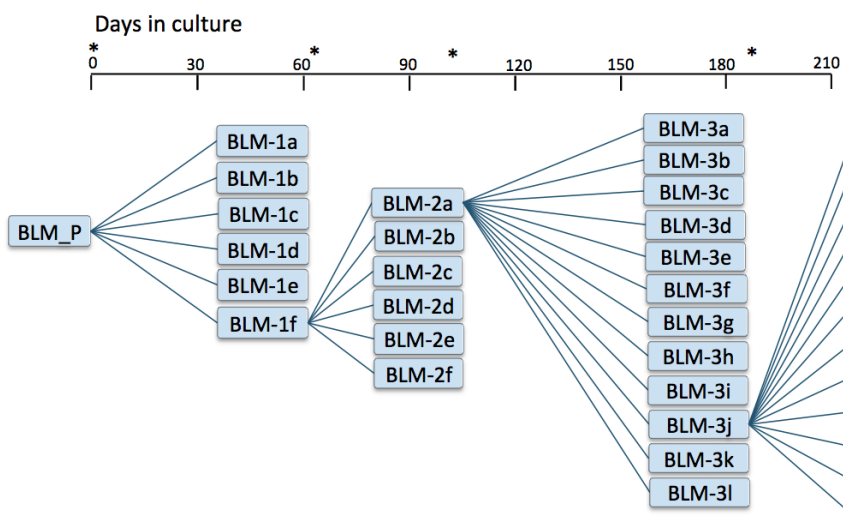

C

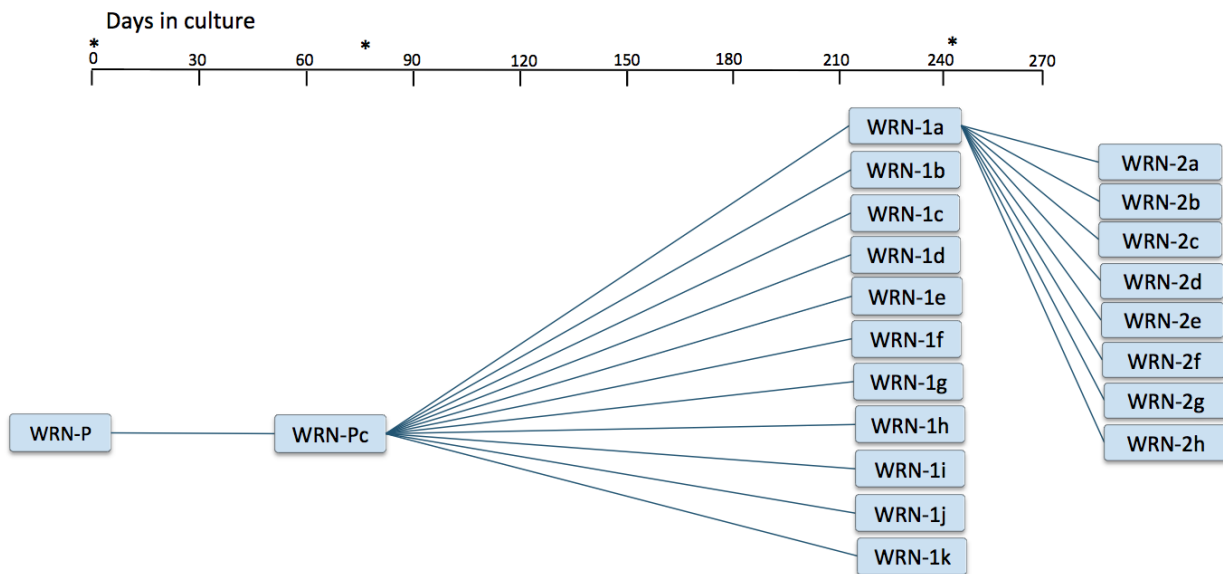

Supplement: S4 (10.1371/journal.pgen.1007490.s004) [file journal.pgen.1007490.s004]
